# Supplementary material for: Design–functionality relationships for adhesion/growth-regulatory galectins
Source: PubMed Central journal article supplement — Proc Natl Acad Sci U S A. 2019 Feb 4;116(8):2837–42. doi: 10.1073/pnas.1813515116 (PMC6386680; doi:10.1073/pnas.1813515116), 2019-02-04
Supplement: pnas.1813515116.sd01.pdf [file pnas.1813515116.sd01.pdf]

# Mass spectra, peptide fingerprints, and sequence coverage together with the listing of detected peptides for each protein indicated

Gal-3—Gal-3

A

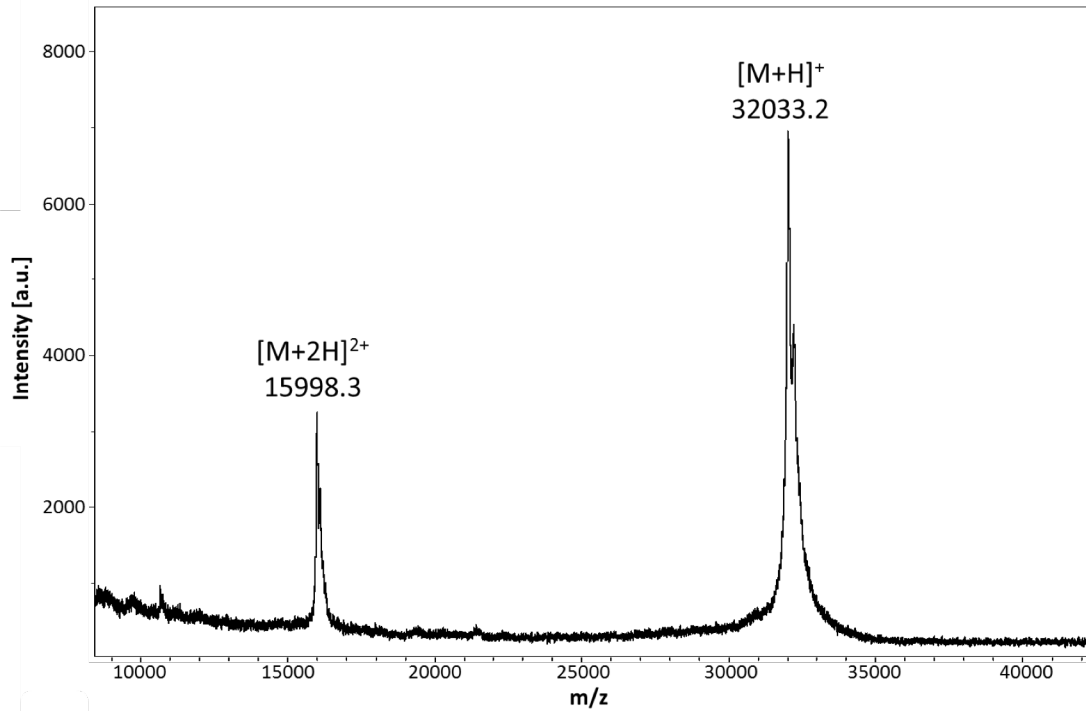

B

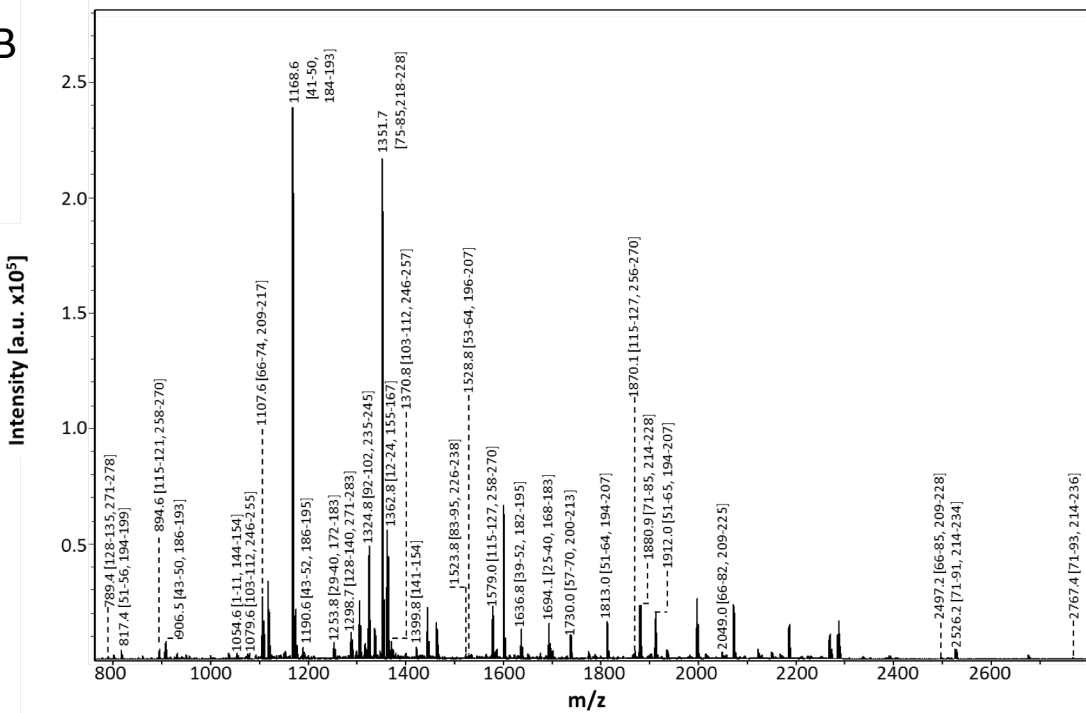

C

Sequence coverage (PMF)

GAPAGLIVPYNLPPLGGVVRMLITILGTVKPNANRIALDFQRGNDVAFHFNPRFNENRRVIVCNTKLDNN  
 WGREERQSVFPFESGKPFKIQLVLEPDHFKVAVNDAHLLQYNHRVKKLNEISKLGISGDIDLTSASYTMIGAPA  
 GPLIVPYNLPPLGGVVRMLITILGTVKPNANRIALDFQRGNDVAFHFNPRFNENRRVIVCNTKLDNNWGRE  
 ERQSVFPFESGKPFKIQLVLEPDHFKVAVNDAHLLQYNHRVKKLNEISKLGISGDIDLTSASYTMI

**Peptide mass fingerprinting of Gal-3—Gal-3 by MALDI-TOF-MS. The list of detected peptides with their calculated (calc) and experimentally measured (exp) mass values**

| Sequence                          | [MH] <sup>+</sup> (mono) calc | [MH] <sup>+</sup> (mono) exp |
|-----------------------------------|-------------------------------|------------------------------|
| GISGDIDL                          | 789.4                         | 789.4                        |
| HFNPRF                            | 817.4                         | 817.4                        |
| NHRVKKL                           | 894.6                         | 894.6                        |
| QRGNDVAF                          | 906.4                         | 906.5                        |
| GAPAGPLIVPY                       | 1054.6                        | 1054.6                       |
| KVAVNDAHLL                        | 1079.6                        | 1079.7                       |
| CNTKLDNNW                         | 1107.5                        | 1107.6                       |
| DFQRGNDVAF                        | 1168.5                        | 1168.6                       |
| QRGNDVAFHF                        | 1190.6                        | 1190.6                       |
| GTVKPNANRIAL                      | 1253.7                        | 1253.8                       |
| GISGDIDLTASY                      | 1298.6                        | 1298.7                       |
| KIQVLVEPDHF                       | 1324.7                        | 1324.8                       |
| GREERQSVFPF                       | 1351.7                        | 1351.7                       |
| NLPLPGGVVPRML                     | 1362.8                        | 1362.8                       |
| KVAVNDAHLLQY                      | 1370.7                        | 1370.8                       |
| TMIGAPAGPLIVPY                    | 1399.8                        | 1399.8                       |
| FPFESGKPKIQV                      | 1523.8                        | 1523.8                       |
| NPRFNENRRVI                       | 1528.8                        | 1528.8                       |
| NHRVKKLNEISKL                     | 1578.9                        | 1579.0                       |
| ALDFQRGNDVAFHF                    | 1636.9                        | 1636.8                       |
| ITILGTVKPNANRIAL                  | 1694.0                        | 1694.1                       |
| NENRRVIVCNTKL <sup>1</sup>        | 1729.9                        | 1730.0                       |
| HFNPRFNENRRVI                     | 1812.9                        | 1813.0                       |
| QYNHRVKKLNEISKL                   | 1870.1                        | 1870.1                       |
| DNNWGREERQSVFPF                   | 1880.9                        | 1880.9                       |
| HFNPRFNENRRVIV                    | 1912.0                        | 1912.0                       |
| CNTKLDNNWGREERQSV                 | 2049.2                        | 2049.0                       |
| CNTKLDNNWGREERQSVFPF <sup>1</sup> | 2497.2                        | 2497.2                       |
| DNNWGREERQSVFPFESGKPF             | 2526.2                        | 2526.2                       |
| DNNWGREERQSVFPFESGKPKI            | 2767.4                        | 2767.4                       |

<sup>1</sup> carbamidomethylation at C

# Gal-3—8S—Gal-3

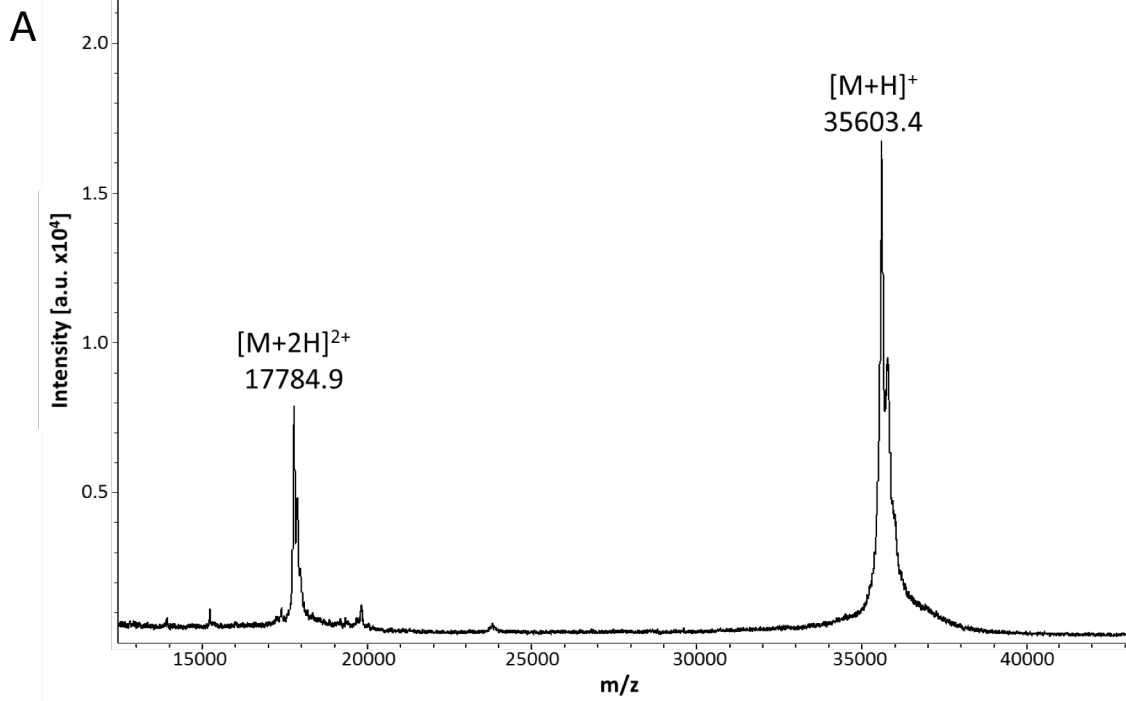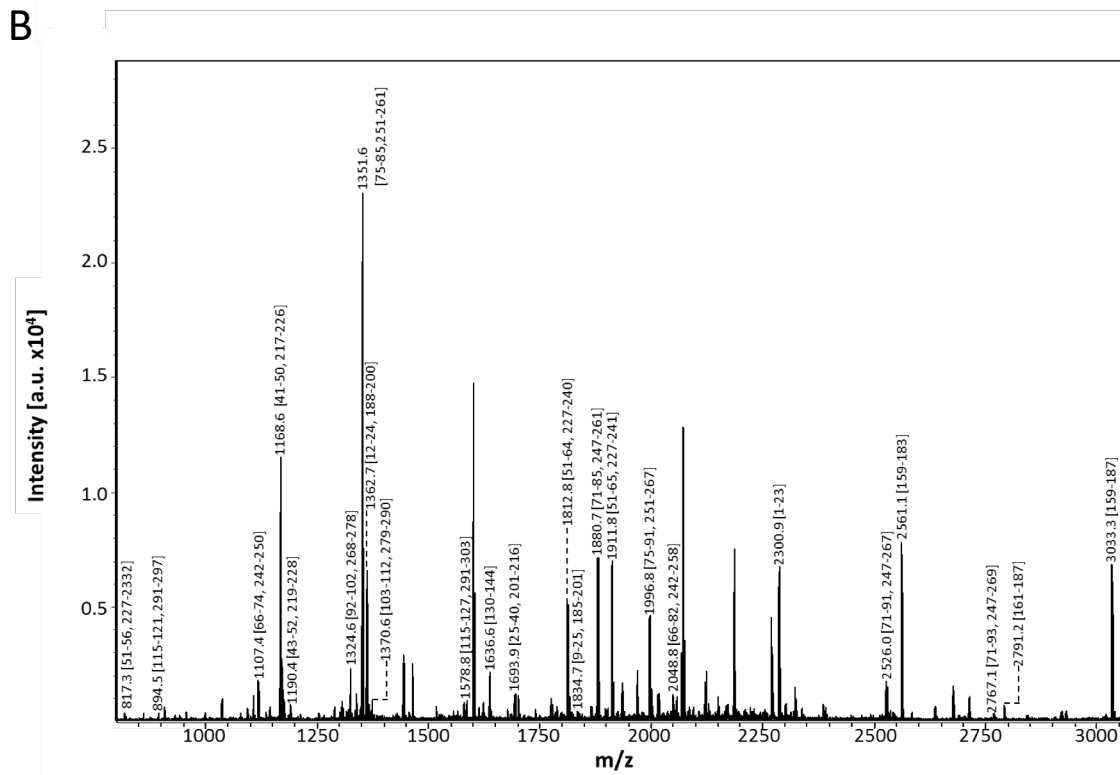

Sequence coverage (PMF)

**C**

GAPAGPLVYPYNLPLPGGVVPRMLITILGTVKPNANRIALDFQRGNDVAFHFNPRFNENRRVIVCNTKL  
DNNWGREERQSVFPFESGKPFKIQLVPEPDHFKVAVNDAHLLQYNHRVKKLNEISKLGISGDIDLTSASYT  
MIFSFSSDLQSTQASSELTEISRENVPKSGTPQLGAPAGPLVYPYNLPLPGGVVPRMLITILGTVKPNANRI  
ALDFQRGNDVAFHFNPRFNENRRVIVCNTKLDNNWGREERQSVFPFESGKPFKIQLVPEPDHFKVAV  
NDAHLLQYNHRVKKLNEISKLGISGDIDLTSASYTMI

**Peptide mass fingerprinting of Gal-3—8S—Gal-3 by MALDI-TOF-MS. The list of detected peptides with their calculated (calc) and experimentally measured (exp) mass values**

| Sequence                            | [MH] <sup>+</sup> (mono) calc | [MH] <sup>+</sup> (mono) exp |
|-------------------------------------|-------------------------------|------------------------------|
| HFNPRF                              | 817.4                         | 817.3                        |
| NHRVKKL                             | 894.6                         | 894.5                        |
| CNTKLDNNW                           | 1107.5                        | 1107.4                       |
| DFQRGNDVAF                          | 1168.5                        | 1168.6                       |
| QRGNDVAFHF                          | 1190.6                        | 1190.4                       |
| KIQVLVEPDHF                         | 1324.7                        | 1324.6                       |
| GREERQSVFPF                         | 1351.7                        | 1351.6                       |
| NLPLPGGVPRML                        | 1362.8                        | 1362.7                       |
| KVAVNDAHLLQY                        | 1370.7                        | 1370.6                       |
| NHRVKKLNEISKL                       | 1578.9                        | 1578.8                       |
| SGDIDLTSASYTMIF <sup>2</sup>        | 1636.7                        | 1636.6                       |
| ITILGTVKPNANRIAL                    | 1694.0                        | 1693.9                       |
| HFNPRFNENRRVI                       | 1812.9                        | 1812.8                       |
| VPYNLPLPGGVPRMLI                    | 1835.1                        | 1834.7                       |
| DNNWGREERQSVFPF                     | 1880.9                        | 1880.7                       |
| HFNPRFNENRRVIV                      | 1912.0                        | 1911.8                       |
| GREERQSVFPFESGKPF                   | 1997.0                        | 1996.8                       |
| CNTKLDNNWGREERQSV                   | 2049.0                        | 2048.8                       |
| GAPAGPLIVPYNLPLPGGVPRM <sup>2</sup> | 2301.3                        | 2300.9                       |
| DNNWGREERQSVFPFESGKPF               | 2526.2                        | 2526.0                       |
| ELTEISRENVKSGTPQLGAPAGPL            | 2561.4                        | 2561.1                       |
| DNNWGREERQSVFPFESGKPKI              | 2767.4                        | 2767.1                       |
| TEISRENVKSGTPQLGAPAGPLIVPY          | 2791.5                        | 2791.2                       |
| ELTEISRENVKSGTPQLGAPAGPLIVPY        | 3033.6                        | 3033.3                       |

<sup>1</sup> carbamidomethylation at C; <sup>2</sup> oxidation at M

# Gal-3—8L—Gal-3

A

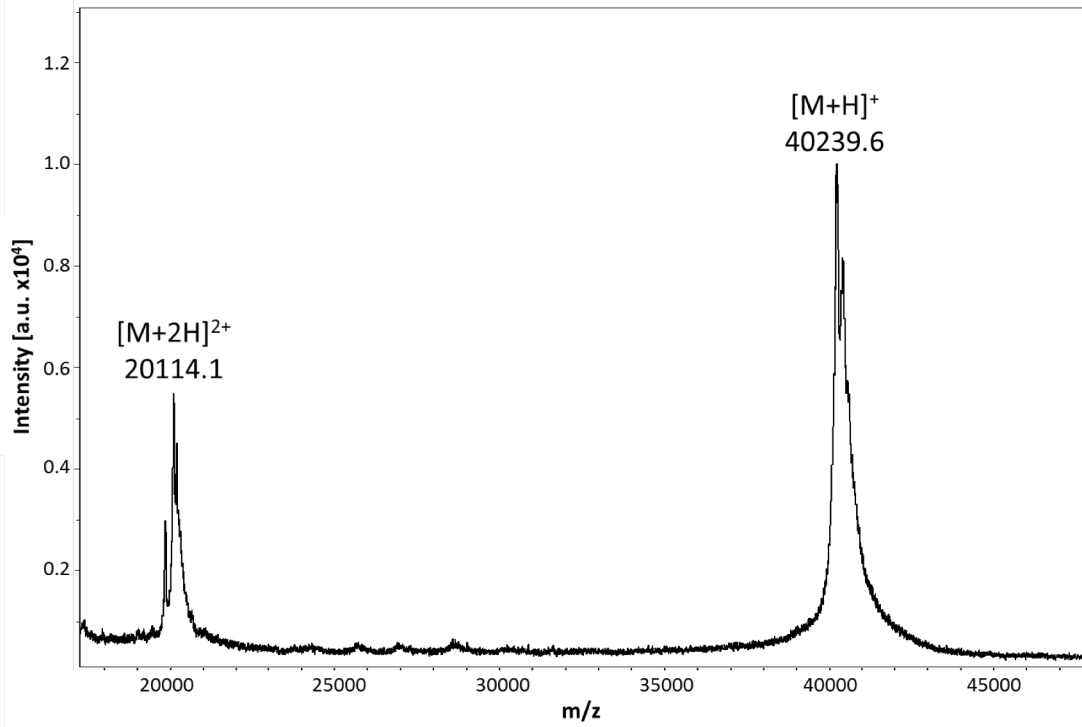

B

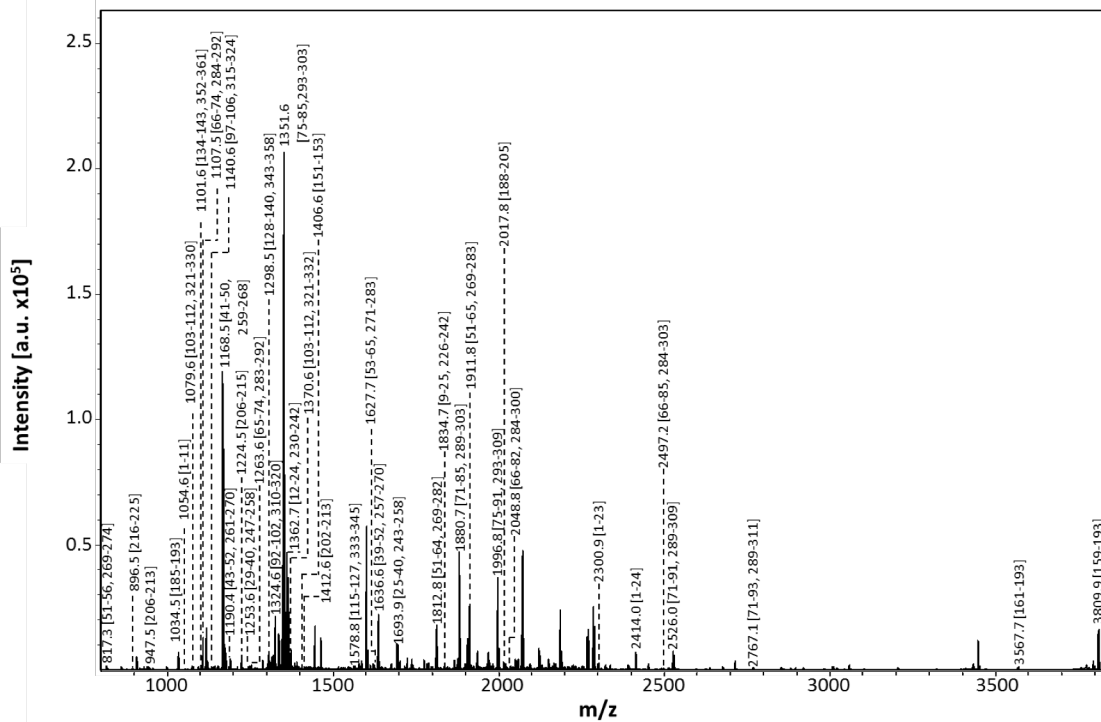

C

Sequence coverage (PMF)

GAPAGPLIVPYNLPLPGGVVPRMLITILGTVKPNANRIALDFQRGNDVAFHFNPRFNENRRRVIVCNTKLDNN  
 WGREERQSVFPFESGKPFKIQLVEPDHFKVAVNDAHLLQYNHRVKKLNEISKLGISGDIDLTSASYTMIFSSF  
 DLQSTQASSLELTEISRENVPKSGTPQLPSNRGGDISKIAPRTVYTKSKDSTVNHTLTCTKIPPMNYVSKGAPAG  
 PLIVPYNLPLPGGVVPRMLITILGTVKPNANRIALDFQRGNDVAFHFNPRFNENRRRVIVCNTKLDNNWGEE  
 RQSVFPFESGKPFKIQLVEPDHFKVAVNDAHLLQYNHRVKKLNEISKLGISGDIDLTSASYTMI

**Peptide mass fingerprinting of Gal-3—8L—Gal-3 by MALDI-TOF-MS. The list of detected peptides with their calculated (calc) and experimentally measured (exp) mass values**

| Sequence                              | [MH] <sup>+</sup> (mono) calc | [MH] <sup>+</sup> (mono) exp |
|---------------------------------------|-------------------------------|------------------------------|
| HFNPRF                                | 817.4                         | 817.3                        |
| VSKGAPAGPL                            | 896.5                         | 896.5                        |
| TCTKIPPM <sup>1</sup>                 | 947.5                         | 947.5                        |
| SKIAPRTVY                             | 1034.6                        | 1034.5                       |
| GAPAGPLIVPY                           | 1054.6                        | 1054.5                       |
| KVAVNDAHLL                            | 1079.6                        | 1079.5                       |
| DLTSASYTMI                            | 1101.5                        | 1101.6                       |
| CNTKLDNNW                             | 1107.5                        | 1107.5                       |
| VEPDHFKVAV                            | 1140.6                        | 1140.6                       |
| DFQRGNDVAF                            | 1168.5                        | 1168.5                       |
| QRGNDVAFHF                            | 1190.6                        | 1190.4                       |
| TCTKIPPMNY <sup>1</sup>               | 1224.6                        | 1224.5                       |
| GTVKPNANRIAL                          | 1253.7                        | 1253.6                       |
| VCNTKLDNNW <sup>1</sup>               | 1263.6                        | 1263.6                       |
| GISGDIDLTSASY                         | 1298.6                        | 1298.5                       |
| KIQVLVEPDHF                           | 1324.7                        | 1324.6                       |
| GREERQSVFPF                           | 1351.7                        | 1351.6                       |
| NLPLPGGVVPRML                         | 1362.8                        | 1362.7                       |
| KVAVNDAHLLQY                          | 1370.7                        | 1370.6                       |
| QSTQASSLELLEI                         | 1406.7                        | 1406.6                       |
| NHTLTCTKIPPM <sup>1</sup>             | 1412.7                        | 1412.6                       |
| NHRVKKLEISKL                          | 1578.9                        | 1578.8                       |
| NPRFNENRRRIV                          | 1627.9                        | 1627.7                       |
| SGDIDLTSASYTMIF <sup>2</sup>          | 1636.7                        | 1636.6                       |
| ITILGTVKPNANRIAL                      | 1694.0                        | 1693.9                       |
| HFNPRFNENRRRVI                        | 1812.9                        | 1812.8                       |
| VPYNLPLPGGVVPRMLI                     | 1835.1                        | 1834.7                       |
| DNNWGREERQSVFPF                       | 1880.9                        | 1880.7                       |
| HFNPRFNENRRRIV                        | 1912.0                        | 1911.8                       |
| GREERQSVFPFESGKPF                     | 1997.0                        | 1996.8                       |
| APRTVYTKSKDSTVNHTL                    | 2018.1                        | 2017.9                       |
| CNTKLDNNWGREERQSV                     | 2049.0                        | 2048.8                       |
| GAPAGPLIVPYNLPLPGGVVPRM <sup>2</sup>  | 2301.3                        | 2300.9                       |
| GAPAGPLIVPYNLPLPGGVVPRML <sup>2</sup> | 2414.4                        | 2414.0                       |
| CNTKLDNNWGREERQSVFPF <sup>1</sup>     | 2497.2                        | 2497.0                       |
| DNNWGREERQSVFPFESGKPF                 | 2526.2                        | 2526.0                       |
| DNNWGREERQSVFPFESGKPKI                | 2767.4                        | 2767.1                       |
| TEISRENVKSGTPQLPSNRGGDISKIAPRTVY      | 3567.9                        | 3567.7                       |
| ELTEISRENVKSGTPQLPSNRGGDISKIAPRTVY    | 3810.0                        | 3809.9                       |

<sup>1</sup> carbamidomethylation at C; <sup>2</sup> oxidation at M

# Gal-3—Gal-1

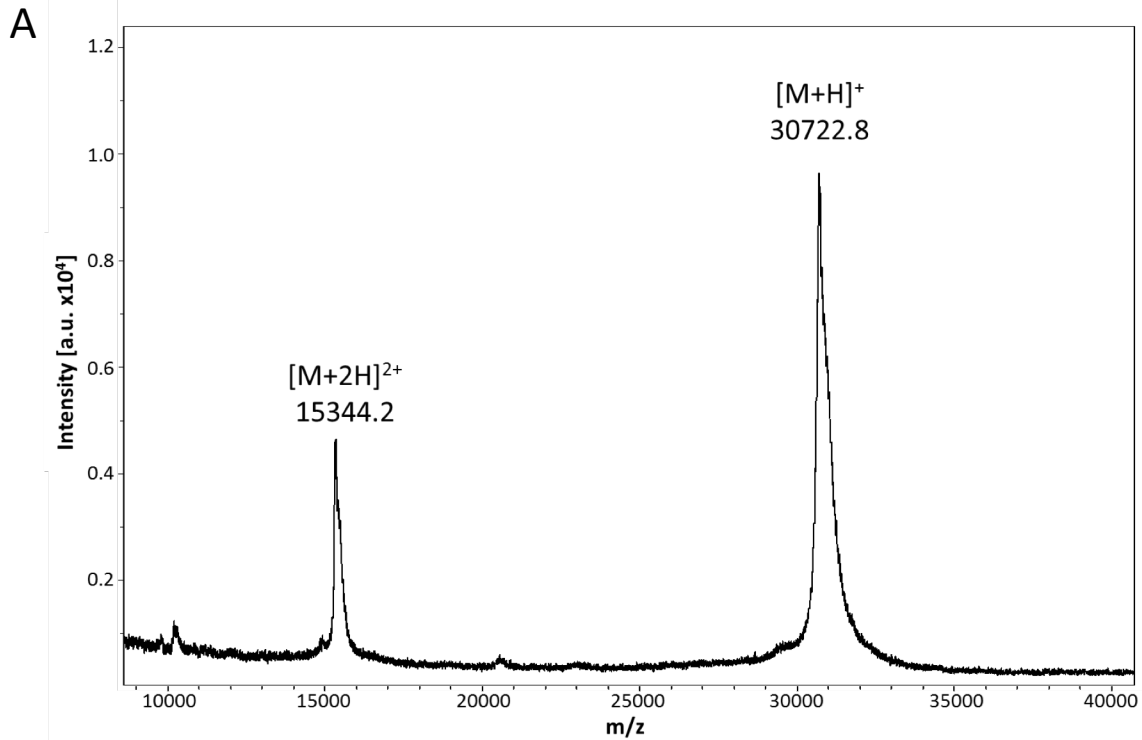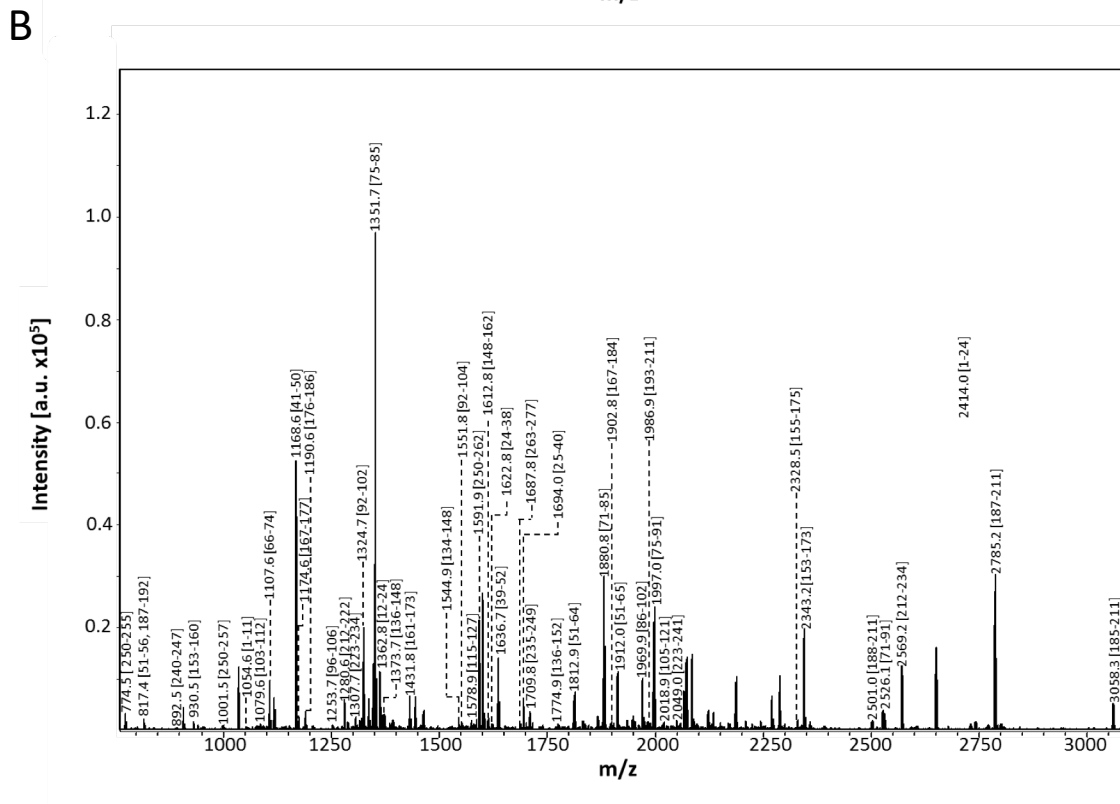

**C**

Sequence coverage (PMF)

```

GAPAGLIVPYNLPLPGGVVPRMLITILGTVKPNANRIALDFQRGNDVAFHFNPRFNENRRRIVVCNTKLDNN
WGREERQSVFPFESGKPFKIQVLVEPDHFKVAVNDAHLLQYNHRVKKLNEISKLGISGDIDLTSASYTMIACGLV
ASNLNLKPGDECLVRGEVAPDAKSFVNLNGKDSNNLCLHFNPRFNAHGDAANTIVCNSKDGGAWGTEQREAVF
PFQPGSVAEVCITFDQANLTVKLPDGYEFKFPNRLNLEAINYMAADGDFKIKCVAFD
    
```

**Peptide mass fingerprinting of Gal-3—Gal-1 by MALDI-TOF-MS. The list of detected peptides with their calculated (calc) and experimentally measured (exp) mass values**

| Sequence                                 | [MH] <sup>+</sup> (mono) calc | [MH] <sup>+</sup> (mono) exp |
|------------------------------------------|-------------------------------|------------------------------|
| KFPNRL                                   | 774.5                         | 774.5                        |
| HFNPRF                                   | 817.4                         | 817.4                        |
| TVKLPDGY                                 | 892.5                         | 892.5                        |
| NLKPGECL <sup>1</sup>                    | 930.5                         | 930.5                        |
| KFPNRLNL                                 | 1001.6                        | 1001.5                       |
| GAPAGPLIVPY                              | 1054.6                        | 1054.6                       |
| KVAVNDAHLL                               | 1079.6                        | 1079.6                       |
| CNTKLDNNW                                | 1107.5                        | 1107.6                       |
| DFQRGNDVAF                               | 1168.5                        | 1168.6                       |
| APDAKSFVLNL                              | 1174.6                        | 1174.6                       |
| NLGKDSNNLCL                              | 1190.6                        | 1190.6                       |
| LVEPDHFKVAV                              | 1253.7                        | 1253.7                       |
| GTEQREAVFPF                              | 1280.6                        | 1280.6                       |
| QPGSVAEVCITF <sup>1</sup>                | 1307.6                        | 1307.7                       |
| KIQVLVEPDHF                              | 1324.7                        | 1324.7                       |
| GREERQSVFPF                              | 1351.7                        | 1351.7                       |
| NLPLPGGVVPRML                            | 1362.8                        | 1362.8                       |
| TSASYTMIACGLV <sup>1</sup>               | 1373.6                        | 1373.7                       |
| RVRGEVAPDAKSF                            | 1431.8                        | 1431.8                       |
| DLTSASYTMIACGLV                          | 1544.7                        | 1544.9                       |
| KIQVLVEPDHFKV                            | 1551.9                        | 1551.8                       |
| NHRVKKLNEISKL                            | 1578.9                        | 1578.9                       |
| KFPNRLNLEAINY                            | 1591.9                        | 1591.9                       |
| VASNLNLKPGECLRV                          | 1612.9                        | 1612.8                       |
| LITILGTVKPNANRI                          | 1623.0                        | 1622.8                       |
| ALDFQRGNDVAFHF                           | 1636.8                        | 1636.7                       |
| MAADGDFKIKCVAFD <sup>1</sup>             | 1687.8                        | 1687.8                       |
| ITILGTVKPNANRIAL                         | 1694.0                        | 1694.0                       |
| DQANLTVKLPDGYEF                          | 1709.8                        | 1709.8                       |
| TSASYTMIACGLVASNL <sup>1,2</sup>         | 1774.8                        | 1774.9                       |
| HFNPRFNENRRVI                            | 1812.9                        | 1812.9                       |
| DNNWGREERQSVFPF                          | 1880.9                        | 1880.8                       |
| APDAKSFVLNLGKDSNNL                       | 1903.0                        | 1902.8                       |
| HFNPRFNENRRVIV                           | 1912.0                        | 1912.0                       |
| ESGKPFKIQVLVEPDHF                        | 1970.0                        | 1969.9                       |
| NAHGDANTIVCNSKDGGAW <sup>1</sup>         | 1986.9                        | 1986.9                       |
| GREERQSVFPFESGKPF                        | 1997.0                        | 1997.0                       |
| AVNDAHLLQYNHRVKKL                        | 2019.1                        | 2018.9                       |
| QPGSVAEVCITFDQANLTV <sup>1</sup>         | 2049.0                        | 2049.0                       |
| KPGECLRVGEVAPDAKSFV <sup>1</sup>         | 2328.2                        | 2328.5                       |
| NLKPGECLRVGEVAPDAKSF <sup>1</sup>        | 2343.2                        | 2343.2                       |
| NPRFNAHGDANTIVCNSKDGGAW <sup>1</sup>     | 2501.1                        | 2501.0                       |
| DNNWGREERQSVFPFESGKPF                    | 2526.2                        | 2526.1                       |
| GTEQREAVFPFQPGSVAEVCITF <sup>1</sup>     | 2569.2                        | 2569.2                       |
| HFNPRFNAHGDANTIVCNSKDGGAW <sup>1</sup>   | 2785.3                        | 2785.2                       |
| CLHFNPRFNAHGDANTIVCNSKDGGAW <sup>1</sup> | 3058.4                        | 3058.3                       |

<sup>1</sup> carbamidomethylation at C; <sup>2</sup> oxidation at M



# Gal-3—8S—Gal-1

A

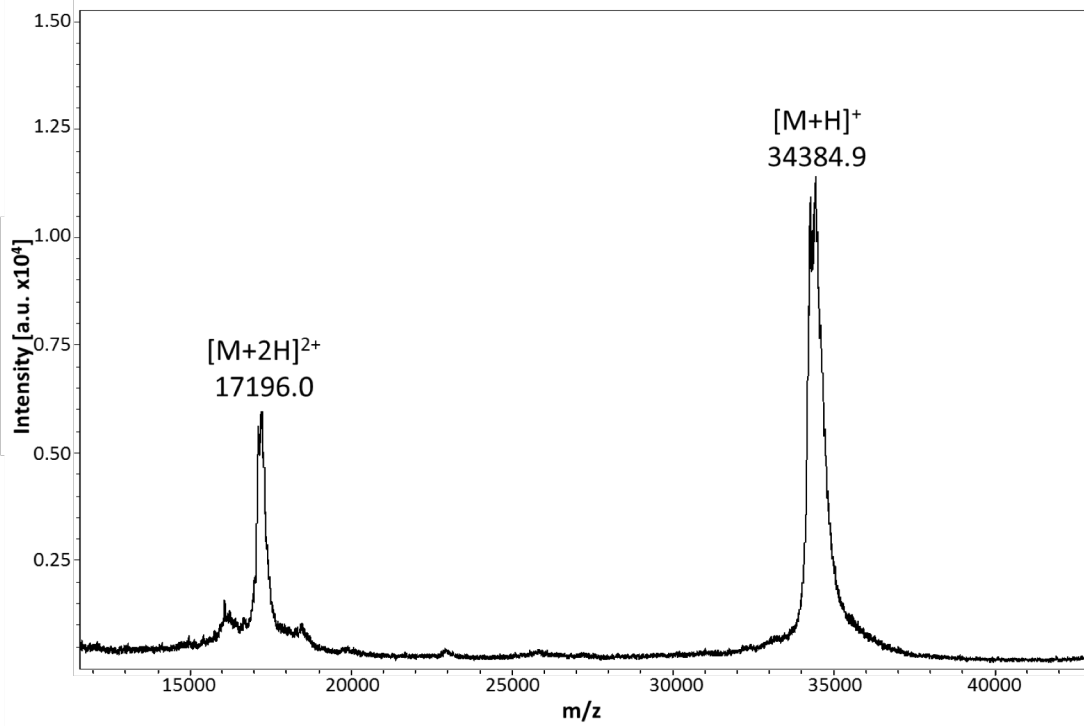

B

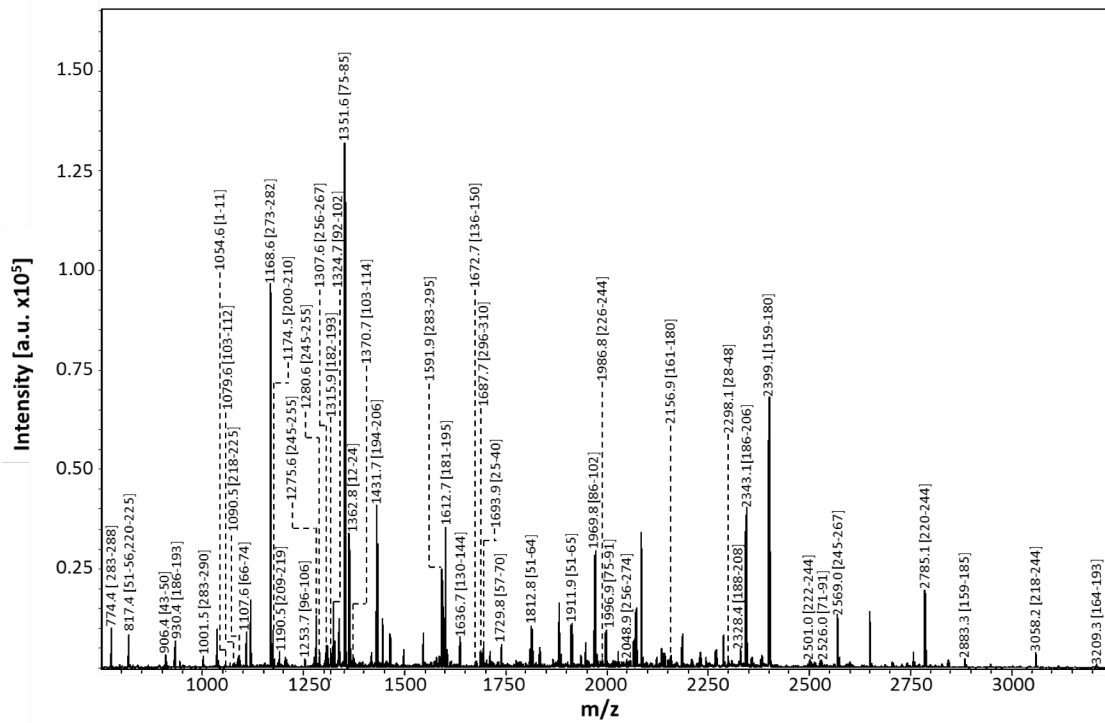

Sequence coverage (PMF)

C

GAPAGPLIVPYNLPLPGGVPRMLITILGTVKPNANRIALDFQRGNDVAFHFNPRFNENRRRIVVCNTKLDNNW  
 GREERQSVFPFESGKPFKIQLVEPDHFKVAVNDAHLLQYNHRVKKLNEISKLGISGDIDLTASAYTMIFSFSSDLQS  
 TQASSLELTEISRENVPKSGTPQLACGLVASNLNKPGECLRVRGEVAPDAKSFVNLNGKDSNNLCLHFNPRFNAH  
 GDANTIVCNSKDGGAWGTEQREAVFPFQPGSVAEVCITFDQANLTVKLPDGYEFKFPNRLNLEAINYMAADGD  
 FKIKCVAFD

Peptide mass fingerprinting of Gal-3—8S—Gal-1 by MALDI-TOF-MS. The list of detected peptides with their calculated (calc) and experimentally measured (exp) mass values

| Sequence                                    | [MH] <sup>+</sup> (mono) calc | [MH] <sup>+</sup> (mono) exp |
|---------------------------------------------|-------------------------------|------------------------------|
| KFPNRL                                      | 774.5                         | 774.4                        |
| HFNPRF                                      | 817.4                         | 817.4                        |
| QRGNDVAF                                    | 906.4                         | 906.4                        |
| NLKPGECL <sup>1</sup>                       | 930.4                         | 930.4                        |
| KFPNRLNL                                    | 1001.6                        | 1001.5                       |
| GAPAGPLIVPY                                 | 1054.6                        | 1054.6                       |
| KVAVNDAHLL                                  | 1079.6                        | 1079.6                       |
| CLHFNPRF <sup>1</sup>                       | 1090.5                        | 1090.5                       |
| CNTKLDNNW                                   | 1107.5                        | 1107.5                       |
| TVKLPDGYEF                                  | 1168.6                        | 1168.5                       |
| APDAKSFVLNL                                 | 1174.6                        | 1174.5                       |
| NLGKDSNNLCL                                 | 1190.6                        | 1190.5                       |
| LVEPDHFQVAV                                 | 1253.7                        | 1253.7                       |
| RGEVAPDAKSFV                                | 1275.7                        | 1275.6                       |
| GTEQREAVFPF                                 | 1280.6                        | 1280.6                       |
| QPGSVAEVCITF <sup>1</sup>                   | 1307.6                        | 1307.6                       |
| ASNLNLKPGECL <sup>1</sup>                   | 1315.7                        | 1315.9                       |
| KIQVLVEPDHF                                 | 1324.7                        | 1324.7                       |
| GREERQSVFPF                                 | 1351.7                        | 1351.6                       |
| NLPLPGGVPRML                                | 1362.8                        | 1362.7                       |
| KVAVNDAHLLQY                                | 1370.7                        | 1370.7                       |
| RVRGEVAPDAKSF                               | 1431.8                        | 1431.7                       |
| KFPNRLNLEAINY                               | 1591.9                        | 1591.8                       |
| VASNLNLKPGECLRV                             | 1612.9                        | 1612.7                       |
| SGDIDLTSADYTMIF <sup>2</sup>                | 1636.8                        | 1636.7                       |
| TSASYTMIFSFSDL <sup>2</sup>                 | 1672.9                        | 1672.7                       |
| MAADGDFKIKCVAFD                             | 1687.8                        | 1687.7                       |
| ITILGTVKPNANRIAL                            | 1694.0                        | 1693.9                       |
| NENRRRIVCNTKL <sup>1</sup>                  | 1729.9                        | 1729.8                       |
| HFNPRFNENRRVI                               | 1812.9                        | 1812.8                       |
| HFNPRFNENRRVIV                              | 1912.0                        | 1911.9                       |
| ESGKPFKIQVLVEPDHF                           | 1970.0                        | 1969.8                       |
| NAHGDANTIVCNSKDGGAW <sup>1</sup>            | 1986.9                        | 1986.8                       |
| GREERQSVFPFESGKPF                           | 1997.0                        | 1996.9                       |
| QPGSVAEVCITFDQANLTV <sup>1</sup>            | 2049.0                        | 2048.9                       |
| ELTEISRENVPKSGTPQLACGL <sup>1</sup>         | 2157.1                        | 2156.9                       |
| LGTVKPNANRIALDFQRGNDV                       | 2298.2                        | 2298.1                       |
| KPGECLRVGEVAPDAKSFV <sup>1</sup>            | 2328.2                        | 2328.4                       |
| NLKPGECLRVGEVAPDAKSF <sup>1</sup>           | 2343.2                        | 2343.1                       |
| ELTEISRENVPKSGTPQLACGL <sup>1</sup>         | 2399.2                        | 2399.1                       |
| NPRFNAHGDANTIVCNSKDGGAW <sup>1</sup>        | 2501.1                        | 2501.0                       |
| DNNWGREERQSVFPFESGKPF                       | 2526.2                        | 2526.0                       |
| GTEQREAVFPFQPGSVAEVCITF <sup>1</sup>        | 2569.2                        | 2569.0                       |
| HFNPRFNAHGDANTIVCNSKDGGAW <sup>1</sup>      | 2785.4                        | 2785.1                       |
| ELTEISRENVPKSGTPQLACGLVASNL <sup>1</sup>    | 2883.5                        | 2883.3                       |
| CLHFNPRFNAHGDANTIVCNSKDGGAW <sup>1</sup>    | 3058.3                        | 3058.2                       |
| SRENVPKSGTPQLACGLVASNLNLKPGECL <sup>1</sup> | 3209.6                        | 3209.3                       |

<sup>1</sup> carbamidomethylation at C; <sup>2</sup> oxidation at M

# Gal-1—Gal-3

A

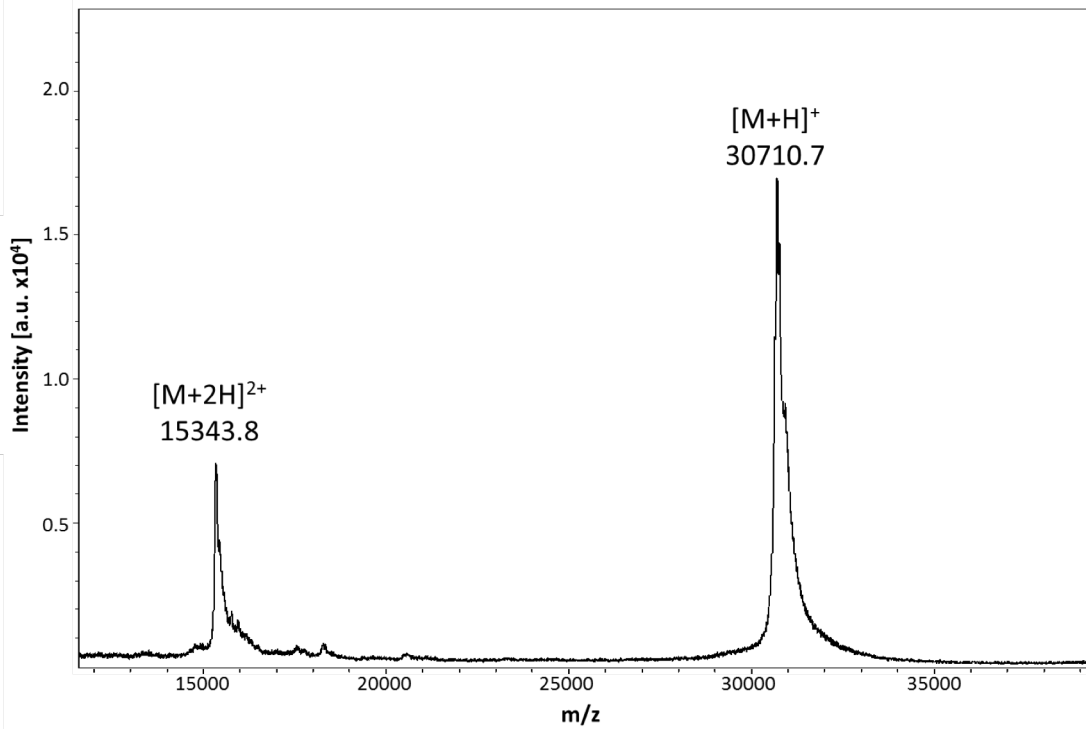

B

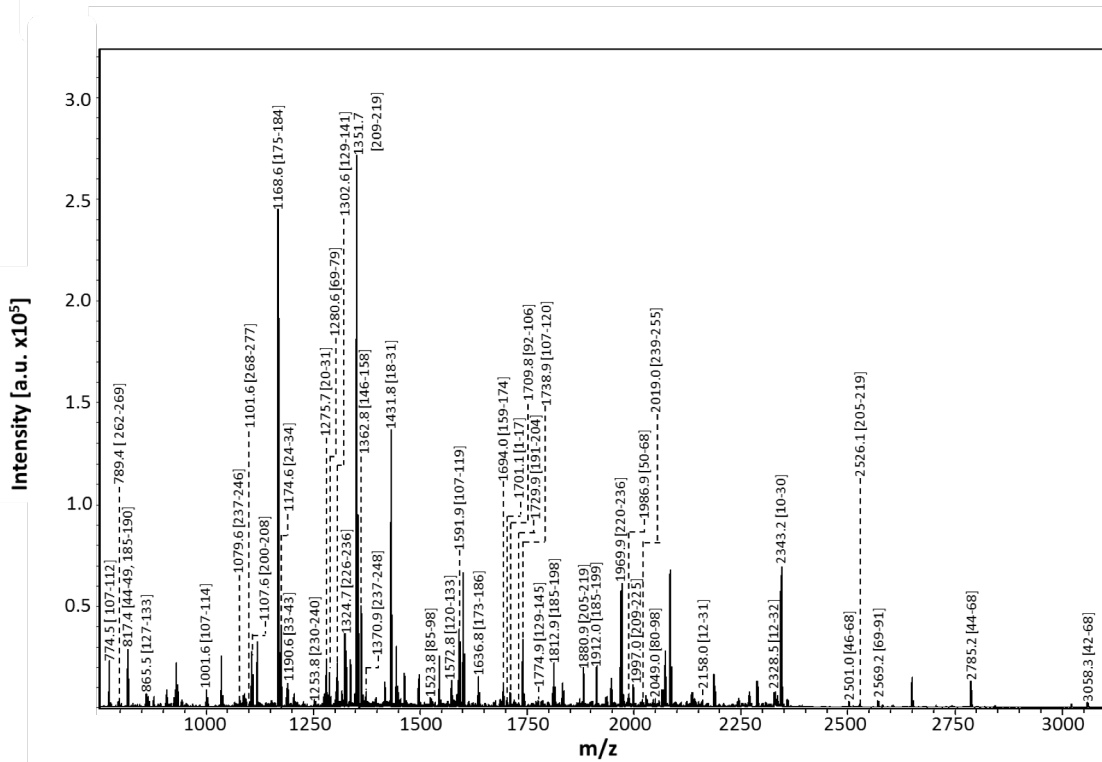

Sequence coverage (PMF)

C

ACGLVASNLNLKPGECLRVRGEVAPDAKSFVLNLGKDSNNLCLHFNPRFNAHGDANTIVCNSKDGGAWGTEQRE  
 AVFPFQPGSVAEVCITFDQANLTVKLPDGYEFKPNRLNLEAINYMAADGDFKIKCVAFDGPAGPLIVPYNLPLPG  
 GVVPRMLITILGTVKPNANRIALDFQRGNDVAFHFNPRFNENRRRIVCNTKLDNNWGREERQSVFPFESGKPKFI  
 QVLVEPDHFKVAVNDAHLLQYNHRVKKLNEISKLGISGDIDLTSASYTMI

**Peptide mass fingerprinting of Gal-1—Gal-3 by MALDI-TOF-MS. The list of detected peptides with their calculated (calc) and experimentally measured (exp) mass values**

| Sequence                                | [MH] <sup>+</sup> (mono) calc | [MH] <sup>+</sup> (mono) exp |
|-----------------------------------------|-------------------------------|------------------------------|
| KFPNRL                                  | 774.5                         | 774.5                        |
| GISGDIDL                                | 789.4                         | 789.4                        |
| HFNPRF                                  | 817.4                         | 817.4                        |
| KIKCVAF <sup>1</sup>                    | 865.5                         | 865.5                        |
| KFPNRLNL                                | 1001.6                        | 1001.6                       |
| KVAVNDAHLL                              | 1079.6                        | 1079.6                       |
| DLTSASYTMI                              | 1101.5                        | 1101.6                       |
| CNTKLDNNW                               | 1107.5                        | 1107.6                       |
| DFQRGNDVAF                              | 1168.5                        | 1168.6                       |
| APDAKSFVNL                              | 1174.6                        | 1174.6                       |
| NLGKDSNNLCL                             | 1190.6                        | 1190.6                       |
| LVEPDHFKVAV                             | 1253.7                        | 1253.8                       |
| RGEVAPDAKSFV                            | 1275.7                        | 1275.7                       |
| GTEQREAVFPF                             | 1280.6                        | 1280.6                       |
| KCVAFDGGAPAGPL <sup>1</sup>             | 1302.7                        | 1302.6                       |
| KIQVLVEPDHF                             | 1324.7                        | 1324.7                       |
| GREERQSVFPF                             | 1351.7                        | 1351.7                       |
| NLPLPGGVVPRML                           | 1362.8                        | 1362.8                       |
| KVAVNDAHLLQY                            | 1370.6                        | 1370.8                       |
| RVRGEVAPDAKSF                           | 1431.8                        | 1431.8                       |
| AEVCITFDQANLTV                          | 1523.8                        | 1523.8                       |
| MAADGDFKIKCVAF <sup>1</sup>             | 1572.8                        | 1572.8                       |
| EPDHFKVAVNDAHL                          | 1591.9                        | 1591.9                       |
| ALDFQRGNDVAFHF                          | 1636.8                        | 1636.8                       |
| ITILGTVKPNANRIAL                        | 1694.0                        | 1694.0                       |
| ACGLVASNLNLKPGECL                       | 1701.8                        | 1701.8                       |
| DQANLTVKLPDGYEF                         | 1709.8                        | 1709.8                       |
| NENNRVIVCNTKL <sup>1</sup>              | 1729.9                        | 1729.9                       |
| KFPNRLNLEAINYM <sup>2</sup>             | 1738.9                        | 1738.9                       |
| KCVAFDGGAPAGPLIVPY <sup>1</sup>         | 1774.9                        | 1774.9                       |
| HFNPRFNENNRVI                           | 1812.9                        | 1812.9                       |
| DNNWGREERQSVFPF                         | 1880.9                        | 1880.9                       |
| HFNPRFNENNRVIV                          | 1912.0                        | 1912.0                       |
| ESGKPFKIQVLVEPDHF                       | 1970.0                        | 1969.9                       |
| NAHGDANTIVCNSKGGAW <sup>1</sup>         | 1986.9                        | 1986.9                       |
| GREERQSVFPFESGKPF                       | 1997.0                        | 1997.0                       |
| AVNDAHLLQYNHRVKKL                       | 2019.1                        | 2019.0                       |
| QPGSVAEVCITFDQANLTV <sup>1</sup>        | 2049.0                        | 2049.0                       |
| KPGECLRVGEVAPDAKSFV                     | 2158.1                        | 2158.0                       |
| KPGECLRVGEVAPDAKSFV <sup>1</sup>        | 2328.2                        | 2328.5                       |
| NLKPGECLRVGEVAPDAKSF <sup>1</sup>       | 2343.2                        | 2343.2                       |
| NPRFNAHGDANTIVCNSKGGAW <sup>1</sup>     | 2501.1                        | 2501.1                       |
| DNNWGREERQSVFPFESGKPF                   | 2526.2                        | 2526.1                       |
| GTEQREAVFPFQPGSVAEVCITF <sup>1</sup>    | 2569.2                        | 2569.2                       |
| HFNPRFNAHGDANTIVCNSKGGAW <sup>1</sup>   | 2785.3                        | 2785.2                       |
| CLHFNPRFNAHGDANTIVCNSKGGAW <sup>1</sup> | 3058.4                        | 3058.3                       |

<sup>1</sup> carbamidomethylation at C; <sup>2</sup> oxidation at M

# Gal-1—8S—Gal-3

A

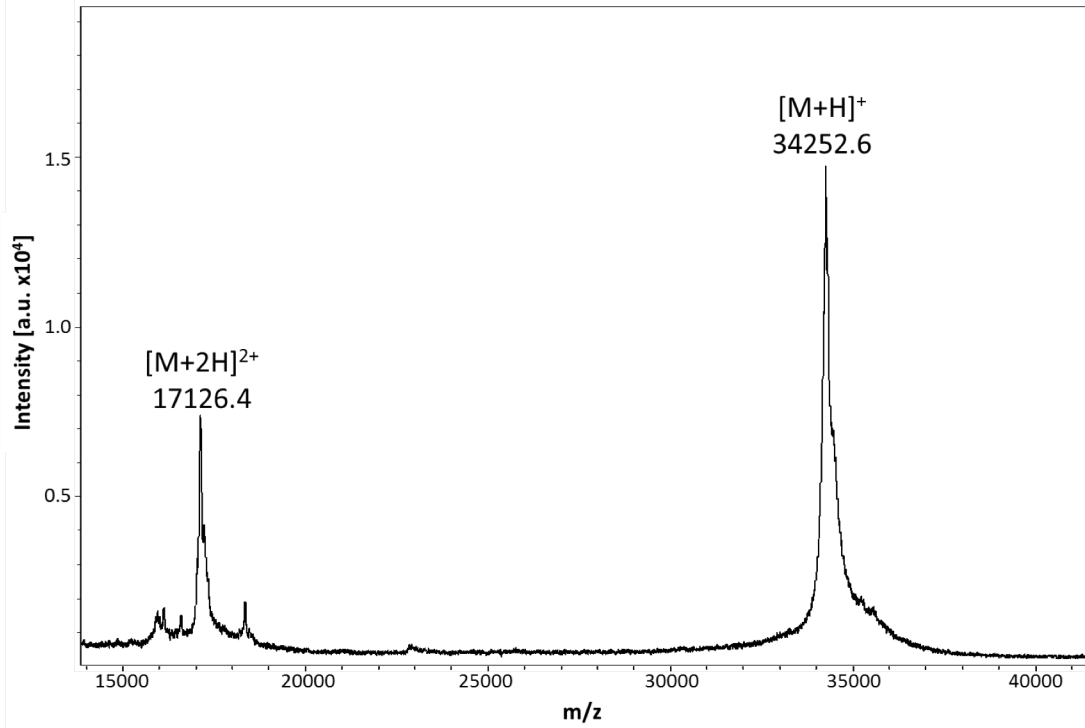

B

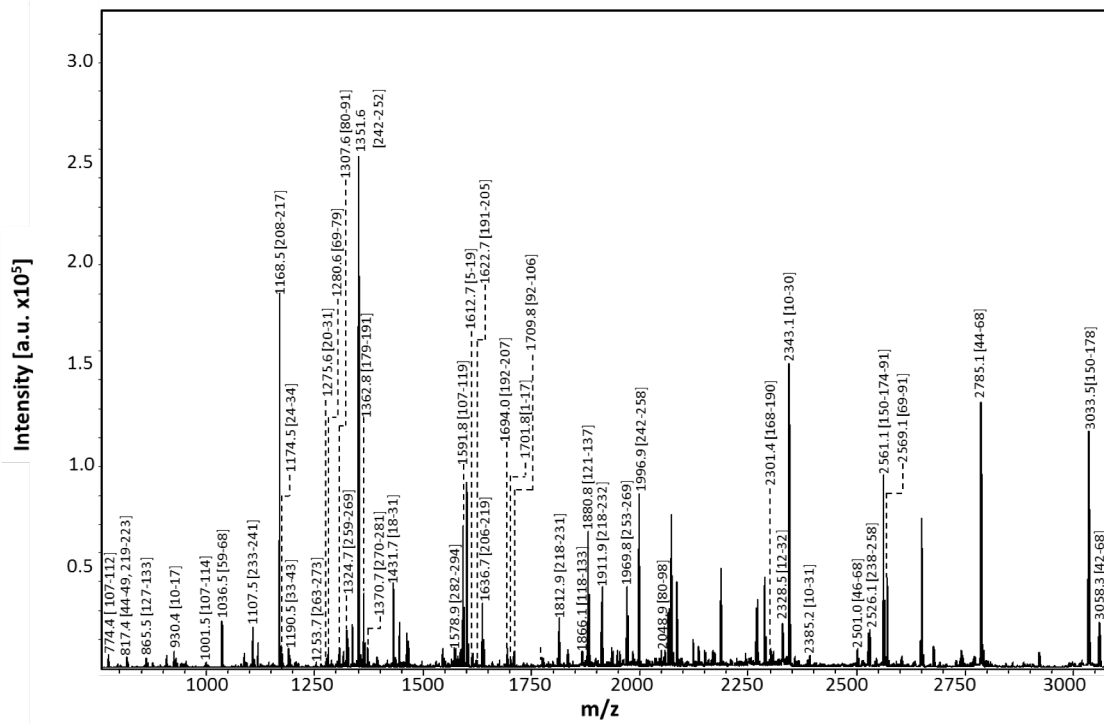

Sequence coverage (PMF)

C

ACGLVASNLNLKPGECLEVRGEVAPDAKSFVLNLGKDSNNLCLHFNPRFNAHGDANTIVCNSKDGG  
 WGTEQREAVFPFQPGSVAEVCITFDQANLTVKLPDGYEFKFPNRLNLEAINYMAADGDFKIKVAFDFS  
 FSSDLQSTQASSLELTEISRENVPKSGTPQLGAPAGPLIVPYNLPLPGGVVPRMLITILGTVKPNANRIALD  
 FQRGNDVAFHFNPRFNENRRRIVCNTKLDNNWGREERQSVFPFESGKPFKIQVLVEPDHFKVAVND  
 AHLQYNHRVKKLNEISKLGISGDIDLTSASYTMI

**Peptide mass fingerprinting of Gal-1—8S—Gal-3 by MALDI-TOF-MS. The list of detected peptides with their calculated (calc) and experimentally measured (exp) mass values**

| Sequence                                 | [MH] <sup>+</sup> (mono) calc | [MH] <sup>+</sup> (mono) exp |
|------------------------------------------|-------------------------------|------------------------------|
| KFPNRL                                   | 774.5                         | 774.4                        |
| HFNPRF                                   | 817.4                         | 817.4                        |
| KIKCVAF <sup>1</sup>                     | 865.5                         | 865.5                        |
| NLKPGECL <sup>1</sup>                    | 930.4                         | 930.4                        |
| KFPNRLNL                                 | 1001.6                        | 1001.5                       |
| VCNSKDGGAW                               | 1036.5                        | 1036.5                       |
| CNTKLDNNW                                | 1107.5                        | 1107.5                       |
| DFQRGNDVAF                               | 1168.6                        | 1168.5                       |
| APDAKSFVLNL                              | 1174.6                        | 1174.5                       |
| NLGKDSNNLCL                              | 1190.6                        | 1190.5                       |
| LVEPDHFKVAV                              | 1253.7                        | 1253.7                       |
| RGEVAPDAKSFV                             | 1275.7                        | 1275.6                       |
| GTEQREAVFPF                              | 1280.6                        | 1280.6                       |
| QPGSVAEVCITF <sup>1</sup>                | 1307.6                        | 1307.6                       |
| KIQVLVEPDHF                              | 1324.7                        | 1324.7                       |
| GREERQSVFPF                              | 1351.7                        | 1351.6                       |
| NLPLPGGVPRML                             | 1362.8                        | 1362.8                       |
| KVAVNDAHLLQY                             | 1370.7                        | 1370.7                       |
| RVRGEVAPDAKSF                            | 1431.8                        | 1431.7                       |
| NHRVKKLNEISKL                            | 1578.9                        | 1578.9                       |
| KFPNRLNLEAINY                            | 1591.9                        | 1591.8                       |
| VASNLNLKPGECLRV                          | 1612.9                        | 1612.7                       |
| LITILGTVKPNANRI                          | 1623.0                        | 1622.7                       |
| ALDFQRGNDVAFHF                           | 1636.8                        | 1636.7                       |
| ITILGTVKPNANRIAL                         | 1694.0                        | 1694.0                       |
| ACGLVASNLNLKPGECL                        | 1701.9                        | 1701.8                       |
| DQANLTVKLPDGYEF                          | 1709.8                        | 1709.8                       |
| HFNPRFNENRRVI                            | 1812.9                        | 1812.9                       |
| NYMAADGDFKIKCVAF <sup>1,2</sup>          | 1865.8                        | 1866.1                       |
| AADGDFKIKCVAFDFSF                        | 1880.9                        | 1880.8                       |
| HFNPRFNENRRVIV                           | 1912.0                        | 1911.9                       |
| ESGKPFKIQVLVEPDHF                        | 1970.0                        | 1969.8                       |
| GREERQSVFPFESGKPF                        | 1997.0                        | 1996.9                       |
| QPGSVAEVCITFDQANLTV <sup>1</sup>         | 2049.0                        | 2048.9                       |
| GAPAGPLIVPYNLPLPGGVPRM <sup>2</sup>      | 2301.3                        | 2301.4                       |
| KPGECLRVRGEVAPDAKSFV <sup>1</sup>        | 2328.2                        | 2328.5                       |
| NLKPGECLRVRGEVAPDAKSF <sup>1</sup>       | 2343.2                        | 2343.1                       |
| NLKPGECLRVRGEVAPDAKSFV                   | 2385.3                        | 2385.2                       |
| NPRFNAHGDANTIVCNSKDGGAW <sup>1</sup>     | 2501.1                        | 2501.0                       |
| DNNWGREERQSVFPFESGKPF                    | 2526.2                        | 2526.1                       |
| ELTEISRENVKSGTPQLGAPAGPL                 | 2561.4                        | 2561.1                       |
| GTEQREAVFPFQPGSVAEVCITF <sup>1</sup>     | 2569.2                        | 2569.1                       |
| HFNPRFNAHGDANTIVCNSKDGGAW <sup>1</sup>   | 2785.4                        | 2785.1                       |
| ELTEISRENVKSGTPQLGAPAGPLIVPY             | 3033.6                        | 3033.5                       |
| CLHFNPRFNAHGDANTIVCNSKDGGAW <sup>1</sup> | 3058.3                        | 3058.3                       |

<sup>1</sup> carbamidomethylation at C; <sup>2</sup> oxidation at M

# Gal-3NT/1

A

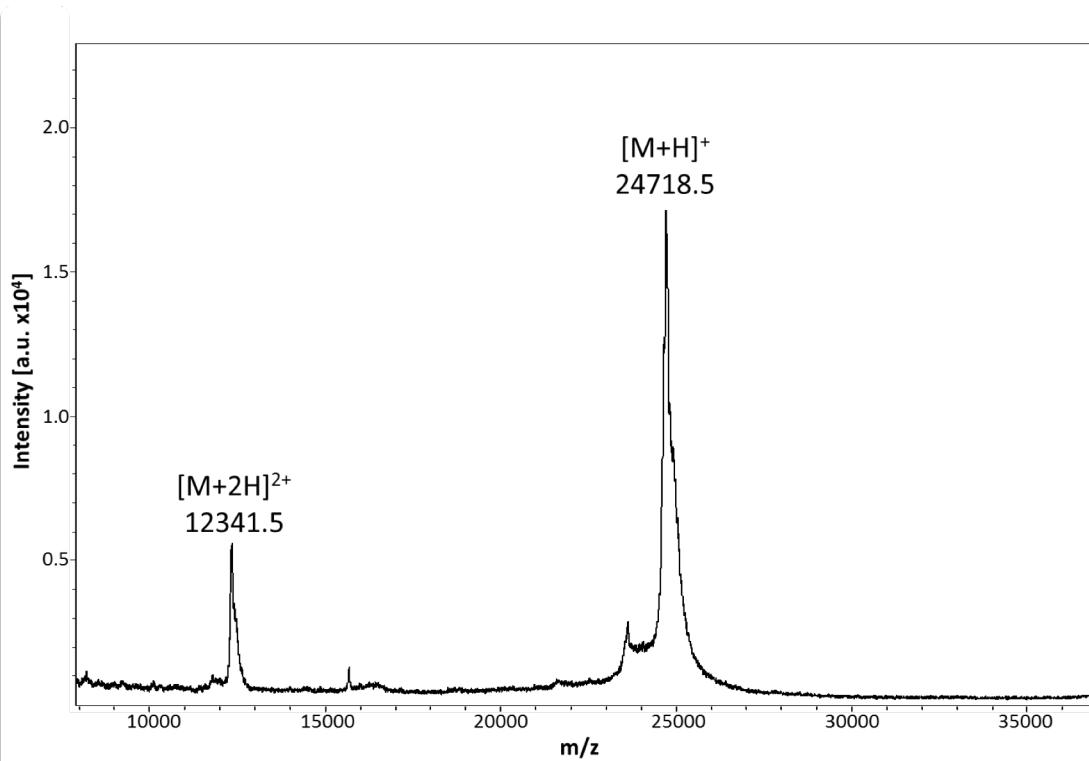

B

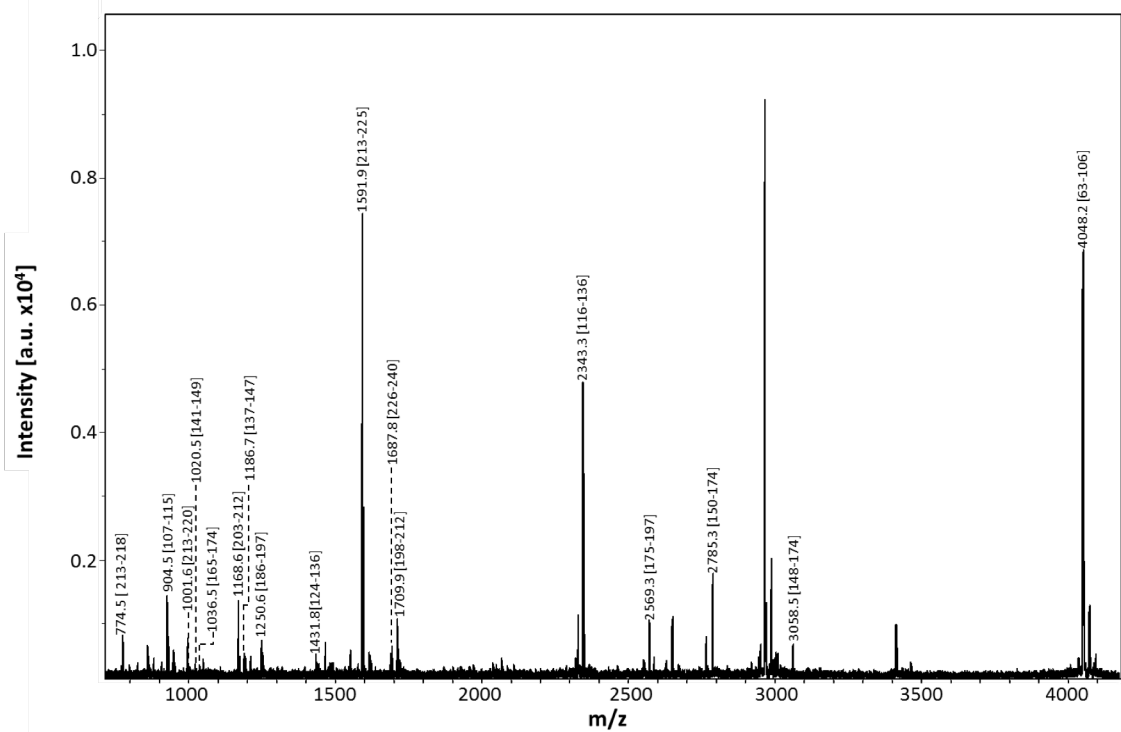

Sequence coverage (PMF)

C

ADNFSLHDALSGSNPNPQGWPGAWGNQAGAGGYPGASYPGAYPGQAPPAYPGQAPPGAYHGAPG  
 AYPGAPAGVYPGPPSPGAYPSSGQPSAPGAYPATGPYACGLVASNLNLKPGCELRVGEVAPDAKSFVLN  
 LGKDSNNLCLHFNPRFNAHGDANTIVCNSKDGGAWGTEQREAVFPFQPGSVAEVCITFDQANLTVKLPDGY  
 EFKFPNRLNLEAINYMAADGDFKIKCVAFD

Peptide mass fingerprinting of Gal-3NT/1 by MALDI-TOF-MS. The list of detected peptides with their calculated (calc) and experimentally measured (exp) mass values

| Sequence                                   | [MH] <sup>+</sup> (mono) calc | [MH] <sup>+</sup> (mono) exp |
|--------------------------------------------|-------------------------------|------------------------------|
| KFPNRL                                     | 774.5                         | 774.5                        |
| ACGLVANSL <sup>1</sup>                     | 904.5                         | 904.5                        |
| KFPNRLNL                                   | 1001.6                        | 1001.6                       |
| GKDSNNCL <sup>1</sup>                      | 1020.5                        | 1020.5                       |
| VCNSKDGGAW                                 | 1036.5                        | 1036.5                       |
| TVKLPDGYEF                                 | 1168.6                        | 1168.6                       |
| VLNLGKDSNNL                                | 1186.6                        | 1186.7                       |
| QPGSVAEVCITF                               | 1250.6                        | 1250.6                       |
| RVRGEVAPDAKSF                              | 1431.8                        | 1431.8                       |
| KFPNRLNLEAINY                              | 1591.8                        | 1591.9                       |
| MAADGDFKIKCVAFD <sup>1</sup>               | 1687.8                        | 1687.8                       |
| DQANLTVKLPDGYEF                            | 1709.8                        | 1709.9                       |
| NLKPGECLRVRGEVAPDAKSF <sup>1</sup>         | 2343.2                        | 2343.3                       |
| GTEQREAVFPFQPGSVAEVCITF <sup>1</sup>       | 2569.2                        | 2569.3                       |
| HFNPRFNAHGDANTIVCNSKDGGAW <sup>1</sup>     | 2785.3                        | 2785.3                       |
| CLHFNPRFNAHGDANTIVCNSKDGGAW <sup>1</sup>   | 3058.4                        | 3058.5                       |
| HGAPGAYPGAPAGVYPGPPSGGAYPSSGQPSAPGAYPATGPY | 4047.9                        | 4048.2                       |

<sup>1</sup> carbamidomethylation at C



# Spectra of N-/C-terminal sequencing by reISD, N-terminal sequencing by linISD, and listing of the detected ions for each analyzed protein and used matrix

Gal-3—Gal-3

A

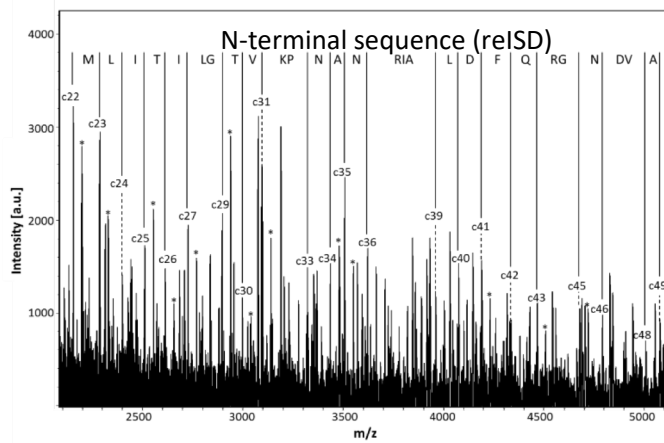

B

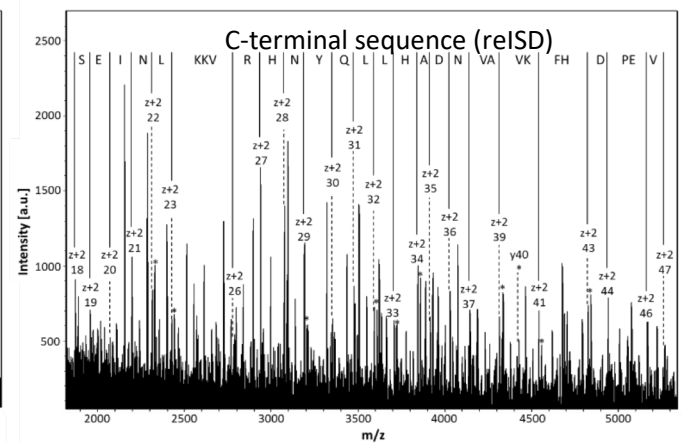

C

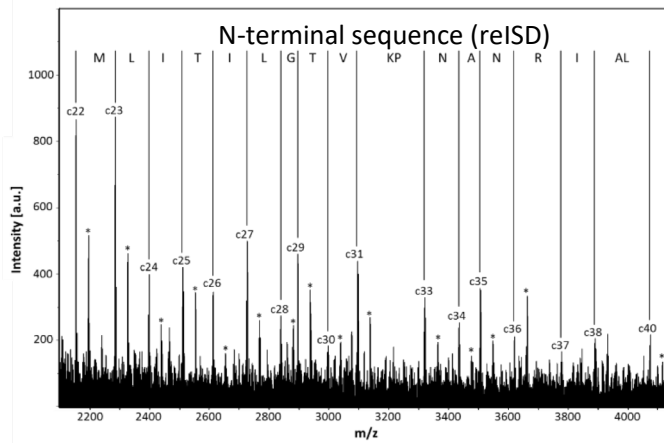

D

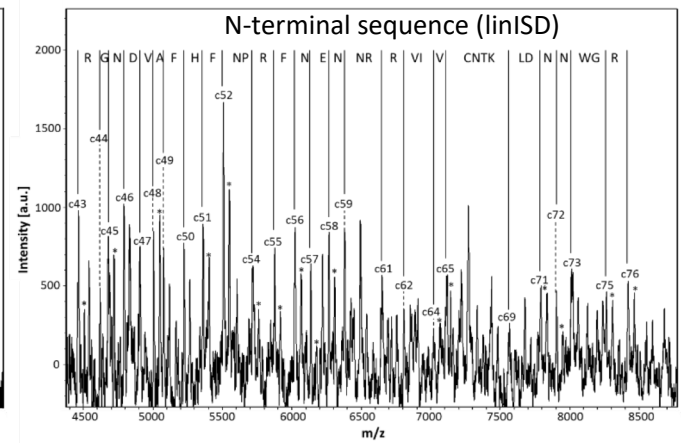

Calculated and experimental masses of c-ions observed in the reISD spectra for Gal-3—Gal-3 with sDHB.

| c-ions | No modifications              |                              | N-terminal acetylation        |                              |
|--------|-------------------------------|------------------------------|-------------------------------|------------------------------|
|        | [MH] <sup>+</sup> (mono) calc | [MH] <sup>+</sup> (mono) exp | [MH] <sup>+</sup> (mono) calc | [MH] <sup>+</sup> (mono) exp |
| c11    | 1053.6                        | 1053.7                       | 1095.6                        | .*                           |
| c12    | 1167.6                        | 1167.7                       | 1209.7                        | .*                           |
| c13    | 1280.7                        | .*                           | 1322.7                        | .*                           |
| c14    | 1377.8                        | 1377.8                       | 1419.8                        | .*                           |
| c15    | 1490.9                        | .*                           | 1532.9                        | .*                           |
| c16    | 1587.9                        | .*                           | 1629.9                        | .*                           |
| c17    | 1644.9                        | 1644.9                       | 1687.0                        | .*                           |
| c18    | 1702.0                        | 1702.1                       | 1744.0                        | .*                           |
| c19    | 1801.0                        | .*                           | 1843.0                        | .*                           |
| c20    | 1900.1                        | .*                           | 1942.1                        | .*                           |
| c21    | 1997.2                        | .*                           | 2039.2                        | .*                           |
| c22    | 2153.2                        | 2153.3                       | 2195.3                        | 2195.3                       |
| c23    | 2284.3                        | 2284.3                       | 2326.3                        | 2326.2                       |
| c24    | 2397.4                        | 2397.5                       | 2439.4                        | .*                           |
| c25    | 2510.5                        | 2510.5                       | 2552.5                        | 2552.5                       |
| c26    | 2611.5                        | 2611.5                       | 2653.5                        | 2653.5                       |
| c27    | 2724.6                        | 2724.6                       | 2766.6                        | 2766.7                       |
| c28    | 2837.7                        | .*                           | 2879.7                        | 2879.7                       |
| c29    | 2894.7                        | 2894.7                       | 2936.7                        | 2936.7                       |
| c30    | 2995.8                        | 2996.0                       | 3037.8                        | .*                           |
| c31    | 3094.8                        | 3094.9                       | 3136.8                        | 3137.1                       |
| c32    | 3222.9                        | .*                           | 3264.9                        | .*                           |
| c33    | 3320.0                        | 3320.2                       | 3362.0                        | 3362.0                       |
| c34    | 3434.0                        | 3434.1                       | 3476.0                        | .*                           |
| c35    | 3505.0                        | 3505.2                       | 3547.0                        | 3547.1                       |
| c36    | 3619.1                        | 3619.3                       | 3661.1                        | .*                           |
| c37    | 3775.2                        | 3775.6                       | 3817.2                        | .*                           |
| c38    | 3888.3                        | 3888.4                       | 3930.3                        | 3930.2                       |
| c39    | 3959.3                        | 3959.2                       | 4001.3                        | 4001.5                       |
| c40    | 4072.4                        | .*                           | 4114.4                        | 4114.6                       |
| c41    | 4187.4                        | 4187.6                       | 4229.4                        | .*                           |
| c42    | 4334.5                        | 4334.9                       | 4376.5                        | 4377.0                       |
| c43    | 4462.6                        | 4463.0                       | 4504.6                        | .*                           |
| c44    | 4618.6                        | 4619.3                       | 4660.7                        | .*                           |
| c45    | 4675.7                        | 4676.1                       | 4717.7                        | .*                           |
| c46    | 4789.7                        | 4790.3                       | 4831.7                        | .*                           |
| c47    | 4904.7                        | .*                           | 4946.8                        | .*                           |
| c48    | 5003.8                        | 5004.5                       | 5045.8                        | .*                           |
| c49    | 5074.8                        | 5074.5                       | 5116.9                        | .*                           |
| c50    | 5221.9                        | 5222.7                       | 5263.9                        | .*                           |
| c51    | 5359.0                        | 5359.8                       | 5401.0                        | .*                           |
| c52    | 5506.0                        | 5506.4                       | 5548.0                        | .*                           |

\*c-ions not observed

Calculated and experimental masses of z+2-ions observed in the reISD spectra for Gal-3—Gal-3.

| z+2-ions | [MH] <sup>+</sup> (mono) calc | [MH] <sup>+</sup> (mono) exp |
|----------|-------------------------------|------------------------------|
| z+2 18   | 1870.0                        | 1870.0                       |
| z+2 19   | 1957.0                        | 1956.9                       |
| z+2 20   | 2070.1                        | 2070.2                       |
| z+2 21   | 2199.1                        | 2198.5                       |
| z+2 22   | 2313.2                        | 2313.3                       |
| z+2 23   | 2426.2                        | 2426.0                       |
| z+2 24   | 2554.3                        | -*                           |
| z+2 25   | 2682.4                        | -*                           |
| z+2 26   | 2781.5                        | 2781.5                       |
| z+2 27   | 2937.6                        | 2937.9                       |
| z+2 28   | 3074.6                        | 3074.7                       |
| z+2 29   | 3188.7                        | 3188.8                       |
| z+2 30   | 3351.8                        | 3351.8                       |
| z+2 31   | 3479.8                        | 3479.1                       |
| z+2 32   | 3592.8                        | 3593.3                       |
| z+2 33   | 3706.0                        | 3706.2                       |
| z+2 34   | 3843.0                        | 3843.3                       |
| z+2 35   | 3914.1                        | 3914.2                       |
| z+2 36   | 4029.1                        | 4029.2                       |
| z+2 37   | 4143.2                        | 4143.5                       |
| z+2 38   | 4242.2                        | -*                           |
| z+2 39   | 4313.3                        | 4313.6                       |
| z+2 40   | 4412.3                        | -*                           |
| z+2 41   | 4540.4                        | 4540.8                       |
| z+2 42   | 4687.5                        | -*                           |
| z+2 43   | 4824.6                        | 4825.2                       |
| z+2 44   | 4939.6                        | 4940.3                       |
| z+2 45   | 5036.6                        | -*                           |
| z+2 46   | 5165.7                        | 5165.4                       |
| z+2 47   | 5264.7                        | 5265.4                       |

\*z+2-ions not observed

Calculated and experimental masses of y-ions observed in the reISD spectra for Gal-3—Gal-3.

| y-ions | [MH] <sup>+</sup> (mono) calc | [MH] <sup>+</sup> (mono) exp |
|--------|-------------------------------|------------------------------|
| y22    | 2328.2                        | 2327.4                       |
| y23    | 2441.2                        | 2440.4                       |
| y24    | 2569.3                        | 2569.3                       |
| y25    | 2697.4                        | -*                           |
| y26    | 2796.5                        | -*                           |
| y27    | 2952.6                        | -*                           |
| y28    | 3089.7                        | 3089.8                       |
| y29    | 3203.7                        | 3203.7                       |
| y30    | 3366.8                        | -*                           |
| y31    | 3494.8                        | -*                           |
| y32    | 3607.9                        | 3608.2                       |
| y33    | 3721.0                        | 3721.1                       |
| y34    | 3858.0                        | 3858.2                       |
| y35    | 3929.1                        | -*                           |
| y36    | 4044.1                        | -*                           |
| y37    | 4158.2                        | -*                           |
| y38    | 4257.2                        | -*                           |
| y39    | 4328.3                        | 4328.5                       |
| y40    | 4427.3                        | 4427.9                       |
| y41    | 4555.4                        | 4555.8                       |
| y42    | 4702.5                        | -*                           |
| y43    | 4839.6                        | 4840.0                       |

\*y-ions not observed

Calculated and experimental masses of c-ions observed in the reISD spectra for Gal-3—Gal-3 with SA.

| c-ions | No modification               |                              | N-terminal acetylation        |                              |
|--------|-------------------------------|------------------------------|-------------------------------|------------------------------|
|        | [MH] <sup>+</sup> (mono) calc | [MH] <sup>+</sup> (mono) exp | [MH] <sup>+</sup> (mono) calc | [MH] <sup>+</sup> (mono) exp |
| c22    | 2153.2                        | 2153.2                       | 2195.3                        | 2195.2                       |
| c23    | 2284.3                        | 2284.2                       | 2326.3                        | 2326.2                       |
| c24    | 2397.4                        | 2397.3                       | 2439.4                        | 2439.3                       |
| c25    | 2510.5                        | 2510.4                       | 2552.5                        | 2552.4                       |
| c26    | 2611.5                        | 2611.4                       | 2653.5                        | 2653.4                       |
| c27    | 2724.6                        | 2724.5                       | 2766.6                        | 2766.5                       |
| c28    | 2837.7                        | 2837.5                       | 2879.7                        | 2879.5                       |
| c29    | 2894.7                        | 2894.5                       | 2936.7                        | 2936.6                       |
| c30    | 2995.8                        | 2995.5                       | 3037.8                        | 3038.1                       |
| c31    | 3094.8                        | 3094.7                       | 3136.8                        | 3136.8                       |
| c32    | 3222.9                        | -*                           | 3264.9                        | -*                           |
| c33    | 3320.0                        | 3319.8                       | 3362.0                        | 3361.5                       |
| c34    | 3434.0                        | 3433.8                       | 3476.0                        | 3476.4                       |
| c35    | 3505.0                        | 3504.9                       | 3547.1                        | 3546.7                       |
| c36    | 3619.1                        | 3619.1                       | 3661.1                        | 3660.8                       |
| c37    | 3775.2                        | 3775.4                       | 3817.2                        | -*                           |
| c38    | 3888.3                        | 3888.0                       | 3930.3                        | -*                           |
| c39    | 3959.3                        | -*                           | 4001.3                        | -*                           |
| c40    | 4072.4                        | 4072.2                       | 4114.4                        | 4114.8                       |

\*c-ions not observed

Calculated and experimental masses of c-ions observed in the linISD spectra for Gal-3—Gal-3 wt with SA.

| c-ions | No modification             |                            | N-terminal acetylation      |                            |
|--------|-----------------------------|----------------------------|-----------------------------|----------------------------|
|        | [MH] <sup>+</sup> (av) calc | [MH] <sup>+</sup> (av) exp | [MH] <sup>+</sup> (av) calc | [MH] <sup>+</sup> (av) exp |
| c43    | 4465.3                      | 4464.8                     | 4507.4                      | 4508.0                     |
| c44    | 4621.5                      | 4620.6                     | 4663.6                      | -*                         |
| c45    | 4678.6                      | 4678.7                     | 4720.6                      | 4720.8                     |
| c46    | 4792.7                      | 4792.6                     | 4834.7                      | -*                         |
| c47    | 4907.8                      | 4907.2                     | 4949.8                      | -*                         |
| c48    | 5006.9                      | 5007.7                     | 5048.9                      | 5048.8                     |
| c49    | 5078.0                      | 5078.2                     | 5120.0                      | -*                         |
| c50    | 5225.2                      | 5225.6                     | 5267.2                      | -*                         |
| c51    | 5362.3                      | 5361.9                     | 5404.3                      | 5404.6                     |
| c52    | 5509.5                      | 5509.5                     | 5551.5                      | 5550.7                     |
| c53    | 5623.6                      | -*                         | 5665.6                      | -*                         |
| c54    | 5720.7                      | 5720.0                     | 5762.7                      | 5761.7                     |
| c55    | 5876.9                      | 5876.6                     | 5918.9                      | 5919.0                     |
| c56    | 6024.0                      | 6023.6                     | 6066.1                      | 6067.0                     |
| c57    | 6138.2                      | 6139.1                     | 6180.2                      | 6181.0                     |
| c58    | 6267.3                      | 6267.8                     | 6309.3                      | 6309.6                     |
| c59    | 6381.4                      | 6381.1                     | 6423.4                      | 6423.6                     |
| c60    | 6495.5                      | -*                         | 6537.5                      | 6537.9                     |
| c61    | 6651.6                      | 6652.1                     | 6693.7                      | -*                         |
| c62    | 6807.8                      | 6807.5                     | 6849.9                      | -*                         |
| c63    | 6907.0                      | -*                         | 6949.0                      | -*                         |
| c64    | 7020.1                      | 7019.2                     | 7062.2                      | 7062.0                     |
| c65    | 7119.3                      | 7118.5                     | 7161.3                      | 7160.5                     |
| c66    | 7222.4                      | -*                         | 7264.4                      | 7263.9                     |
| c67    | 7336.5                      | -*                         | 7378.5                      | -*                         |
| c68    | 7437.6                      | -*                         | 7479.6                      | -*                         |
| c69    | 7565.8                      | 7566.7                     | 7607.8                      | -*                         |
| c70    | 7678.9                      | -*                         | 7721.0                      | -*                         |
| c71    | 7794.0                      | 7793.2                     | 7836.1                      | 7836.6                     |
| c72    | 7908.1                      | 7907.2                     | 7950.2                      | 7951.0                     |
| c73    | 8022.2                      | 8022.0                     | 8064.3                      | -*                         |
| c74    | 8208.4                      | -*                         | 8250.5                      | -*                         |
| c75    | 8265.5                      | 8264.9                     | 8370.5                      | 8307.8                     |
| c76    | 8421.7                      | 8421.9                     | 8463.7                      | 8463.6                     |

\*c-ions not observed

# Gal-3—8S—Gal-3

A

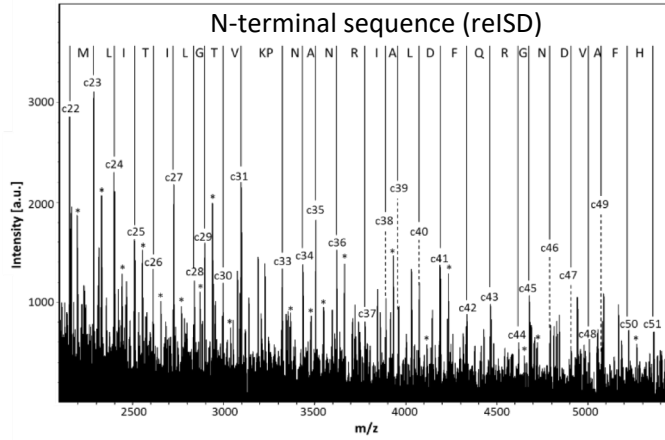

B

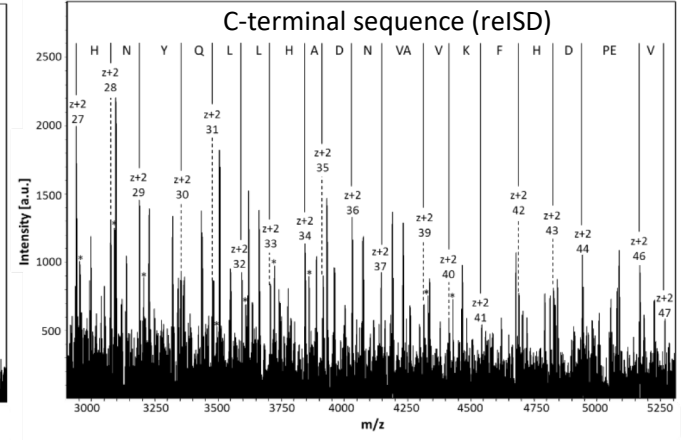

C

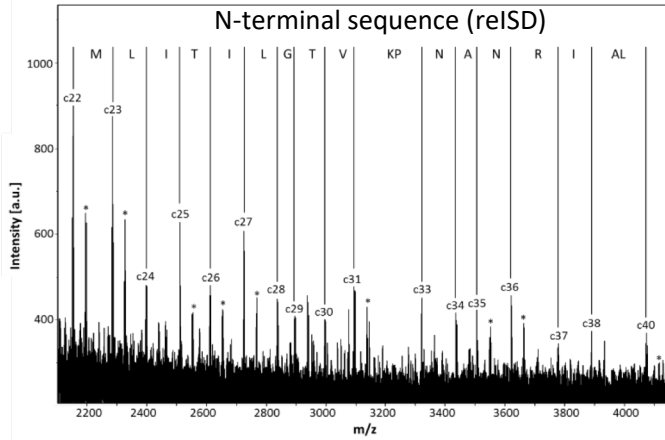

D

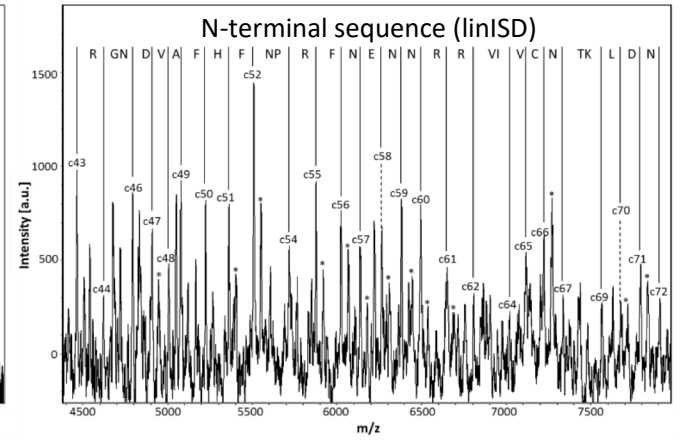

Calculated and experimental masses of c-ions observed in the reISD spectra for Gal-3—8S—Gal-3 with sDHB.

| c-ions | No modifications              |                              | N-terminal acetylation        |                              |
|--------|-------------------------------|------------------------------|-------------------------------|------------------------------|
|        | [MH] <sup>+</sup> (mono) calc | [MH] <sup>+</sup> (mono) exp | [MH] <sup>+</sup> (mono) calc | [MH] <sup>+</sup> (mono) exp |
| c22    | 2153.2                        | 2153.4                       | 2195.3                        | 2195.4                       |
| c23    | 2284.3                        | 2284.4                       | 2326.3                        | 2326.4                       |
| c24    | 2397.4                        | 2397.5                       | 2439.4                        | 2439.4                       |
| c25    | 2510.5                        | 2510.6                       | 2552.5                        | 2552.5                       |
| c26    | 2611.5                        | 2611.6                       | 2653.5                        | 2653.4                       |
| c27    | 2724.6                        | 2724.7                       | 2766.6                        | 2766.6                       |
| c28    | 2837.7                        | 2837.8                       | 2879.7                        | 2879.7                       |
| c29    | 2894.7                        | 2894.8                       | 2936.7                        | 2936.8                       |
| c30    | 2995.8                        | 2995.8                       | 3037.8                        | 3037.8                       |
| c31    | 3094.8                        | 3095.0                       | 3136.8                        | 3137.1                       |
| c32    | 3222.9                        | -*                           | 3264.9                        | -*                           |
| c33    | 3320.0                        | 3320.1                       | 3362.0                        | 3362.1                       |
| c34    | 3434.0                        | 3434.1                       | 3476.0                        | 3475.9                       |
| c35    | 3505.0                        | 3505.2                       | 3547.0                        | 3547.9                       |
| c36    | 3619.1                        | 3619.3                       | 3661.1                        | 3661.2                       |
| c37    | 3775.2                        | 3775.4                       | 3817.2                        | -*                           |
| c38    | 3888.3                        | 3887.6                       | 3930.3                        | 3930.6                       |
| c39    | 3959.3                        | 3959.6                       | 4001.3                        | -*                           |
| c40    | 4072.4                        | 4072.4                       | 4114.4                        | 4114.8                       |
| c41    | 4187.4                        | 4187.9                       | 4229.4                        | 4229.8                       |
| c42    | 4334.5                        | 4334.9                       | 4376.5                        | -*                           |
| c43    | 4462.6                        | 4462.9                       | 4504.6                        | -*                           |
| c44    | 4618.6                        | 4618.9                       | 4660.7                        | 4661.2                       |
| c45    | 4675.7                        | 4676.2                       | 4717.7                        | 4718.1                       |
| c46    | 4789.7                        | 4790.4                       | 4831.7                        | -*                           |
| c47    | 4904.7                        | 4904.4                       | 4946.8                        | -*                           |
| c48    | 5003.8                        | 5004.4                       | 5045.8                        | -*                           |
| c49    | 5074.8                        | 5074.4                       | 5116.9                        | -*                           |
| c50    | 5221.9                        | 5221.7                       | 5263.9                        | 5264.7                       |
| c51    | 5359.0                        | 5359.1                       | 5401.0                        | -*                           |

\*c-ions not observed

Calculated and experimental masses of z+2-ions observed in the reISD spectra for Gal-3—8S—Gal-3.

| z+2-ions | [MH] <sup>+</sup> (mono) calc | [MH] <sup>+</sup> (mono) exp |
|----------|-------------------------------|------------------------------|
| z+2 27   | 2937.6                        | 2937.6                       |
| z+2 28   | 3074.6                        | 3074.9                       |
| z+2 29   | 3188.7                        | 3188.7                       |
| z+2 30   | 3351.8                        | 3351.8                       |
| z+2 31   | 3479.8                        | 3479.9                       |
| z+2 32   | 3592.8                        | 3593.0                       |
| z+2 33   | 3706.0                        | 3706.2                       |
| z+2 34   | 3843.0                        | 3843.4                       |
| z+2 35   | 3914.1                        | 3914.4                       |
| z+2 36   | 4029.1                        | 4029.5                       |
| z+2 37   | 4143.2                        | 4143.7                       |
| z+2 38   | 4242.2                        | -*                           |
| z+2 39   | 4313.3                        | 4313.8                       |
| z+2 40   | 4412.3                        | 4412.8                       |
| z+2 41   | 4540.4                        | 4540.8                       |
| z+2 42   | 4687.5                        | 4687.4                       |
| z+2 43   | 4824.6                        | 4825.3                       |
| z+2 44   | 4939.6                        | 4939.2                       |
| z+2 45   | 5036.6                        | -*                           |
| z+2 46   | 5165.7                        | 5156.8                       |
| z+2 47   | 5264.7                        | 5264.7                       |

\*z+2-ions not observed

Calculated and experimental masses of y-ions observed in the reISD spectra for Gal-3—8S—Gal-3.

| y-ions | [MH] <sup>+</sup> (mono) calc | [MH] <sup>+</sup> (mono) exp |
|--------|-------------------------------|------------------------------|
| y27    | 2952.6                        | 2952.7                       |
| y28    | 3089.7                        | 3089.8                       |
| y29    | 3203.7                        | 3204.0                       |
| y30    | 3366.8                        | -*                           |
| y31    | 3494.8                        | 3495.0                       |
| y32    | 3607.9                        | 3608.0                       |
| y33    | 3721.0                        | 3721.3                       |
| y34    | 3858.0                        | 3858.4                       |
| y35    | 3929.1                        | -*                           |
| y36    | 4044.1                        | -*                           |
| y37    | 4158.2                        | -*                           |
| y38    | 4257.2                        | -*                           |
| y39    | 4328.3                        | 4328.8                       |
| y40    | 4427.3                        | 4427.9                       |
| y41    | 4555.4                        | -*                           |
| y42    | 4702.5                        | 4703.0                       |
| y43    | 4839.6                        | -*                           |
| y44    | 4954.6                        | -*                           |
| y45    | 5051.6                        | 5051.3                       |

\*y-ions not observed



Calculated and experimental masses of c-ions observed in the reISD spectra for Gal-3—8S—Gal-3 with SA.

| c-ions | No modification               |                              | N-terminal acetylation        |                              |
|--------|-------------------------------|------------------------------|-------------------------------|------------------------------|
|        | [MH] <sup>+</sup> (mono) calc | [MH] <sup>+</sup> (mono) exp | [MH] <sup>+</sup> (mono) calc | [MH] <sup>+</sup> (mono) exp |
| c22    | 2153.2                        | 2153.3                       | 2195.3                        | 2195.4                       |
| c23    | 2284.3                        | 2284.4                       | 2326.3                        | 2326.3                       |
| c24    | 2397.4                        | 2397.3                       | 2439.4                        | _*                           |
| c25    | 2510.5                        | 2510.5                       | 2552.5                        | 2552.5                       |
| c26    | 2611.5                        | 2611.5                       | 2653.5                        | 2653.6                       |
| c27    | 2724.6                        | 2724.7                       | 2766.6                        | 2766.6                       |
| c28    | 2837.7                        | 2837.7                       | 2879.7                        | _*                           |
| c29    | 2894.7                        | 2894.7                       | 2936.7                        | _*                           |
| c30    | 2995.8                        | 2995.8                       | 3037.8                        | _*                           |
| c31    | 3094.8                        | 3094.8                       | 3136.8                        | 3136.8                       |
| c32    | 3222.9                        | _*                           | 3264.9                        | _*                           |
| c33    | 3320.0                        | 3319.8                       | 3362.0                        | _*                           |
| c34    | 3434.0                        | 3434.0                       | 3476.0                        | _*                           |
| c35    | 3505.0                        | 3505.0                       | 3547.1                        | 3547.0                       |
| c36    | 3619.1                        | 3619.2                       | 3661.1                        | 3660.9                       |
| c37    | 3775.2                        | 3775.1                       | 3817.2                        | _*                           |
| c38    | 3888.3                        | 3888.3                       | 3930.3                        | _*                           |
| c39    | 3959.3                        | _*                           | 4001.3                        | _*                           |
| c40    | 4072.4                        | 4072.4                       | 4114.4                        | 4114.3                       |

\*c-ions not observed

Calculated and experimental masses of c-ions observed in the linISD spectra for Gal-3—8S—Gal-3 with SA.

| c-ions | No modification             |                            | N-terminal acetylation      |                            |
|--------|-----------------------------|----------------------------|-----------------------------|----------------------------|
|        | [MH] <sup>+</sup> (av) calc | [MH] <sup>+</sup> (av) exp | [MH] <sup>+</sup> (av) calc | [MH] <sup>+</sup> (av) exp |
| c43    | 4465.3                      | 4464.8                     | 4507.4                      | -*                         |
| c44    | 4621.5                      | 4620.8                     | 4663.6                      | -*                         |
| c45    | 4678.6                      | -*                         | 4720.6                      | 4720.2                     |
| c46    | 4792.7                      | 4792.5                     | 4834.7                      | -*                         |
| c47    | 4907.8                      | 4908.3                     | 4949.8                      | 4949.1                     |
| c48    | 5006.9                      | 5007.1                     | 5048.9                      | -*                         |
| c49    | 5078.0                      | 5077.7                     | 5120.0                      | 5120.4                     |
| c50    | 5225.2                      | 5225.0                     | 5267.2                      | -*                         |
| c51    | 5362.3                      | 5361.9                     | 5404.3                      | 5404.6                     |
| c52    | 5509.5                      | 5508.5                     | 5551.5                      | 5551.4                     |
| c53    | 5623.6                      | -*                         | 5665.6                      | -*                         |
| c54    | 5720.7                      | 5719.8                     | 5762.7                      | -*                         |
| c55    | 5876.9                      | 5877.0                     | 5918.9                      | 5918.6                     |
| c56    | 6024.0                      | 6024.0                     | 6066.1                      | 6066.7                     |
| c57    | 6138.2                      | 6138.0                     | 6180.2                      | 6180.2                     |
| c58    | 6267.3                      | 6268.0                     | 6309.3                      | 6308.8                     |
| c59    | 6381.4                      | 6381.4                     | 6423.4                      | 6423.8                     |
| c60    | 6495.5                      | 6494.5                     | 6537.5                      | 6537.1                     |
| c61    | 6651.6                      | 6651.4                     | 6693.7                      | 6694.2                     |
| c62    | 6807.8                      | 6808.3                     | 6849.9                      | -*                         |
| c63    | 6907.0                      | -*                         | 6949.0                      | -*                         |
| c64    | 7020.1                      | 7020.5                     | 7062.2                      | -*                         |
| c65    | 7119.3                      | 7119.3                     | 7161.3                      | -*                         |
| c66    | 7222.4                      | 7223.2                     | 7264.4                      | 7265.1                     |
| c67    | 7336.5                      | 7337.0                     | 7378.5                      | -*                         |
| c68    | 7437.6                      | -*                         | 7479.6                      | 7479.0                     |
| c69    | 7565.8                      | 7565.9                     | 7607.8                      | -*                         |
| c70    | 7678.9                      | 7679.5                     | 7721.0                      | 7720.6                     |
| c71    | 7794.0                      | 7793.9                     | 7836.1                      | 7835.8                     |
| c72    | 7908.1                      | 7908.4                     | 7950.2                      | -*                         |

\*c-ions not observed

# Gal-3—8L—Gal-3

A

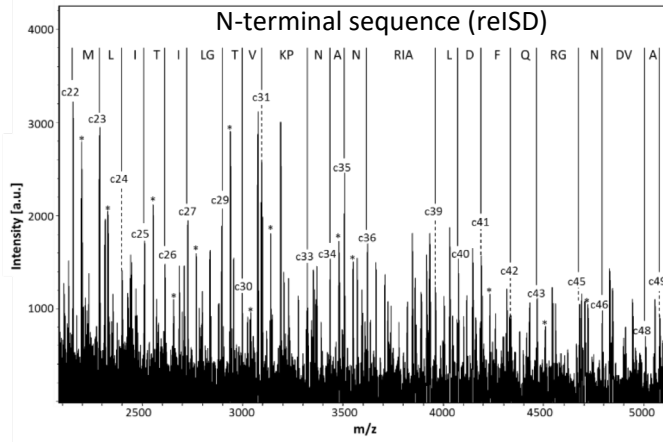

B

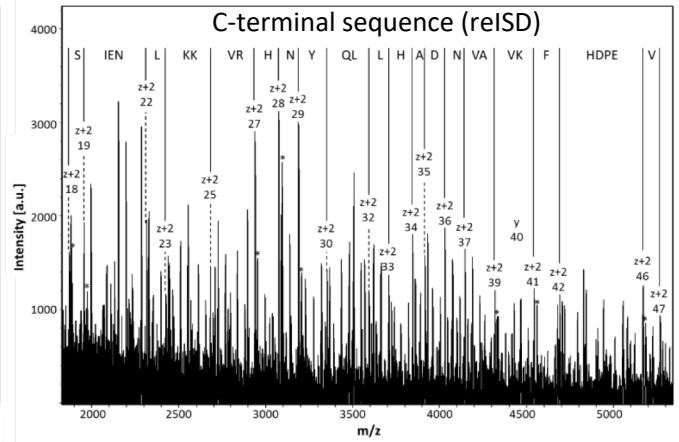

C

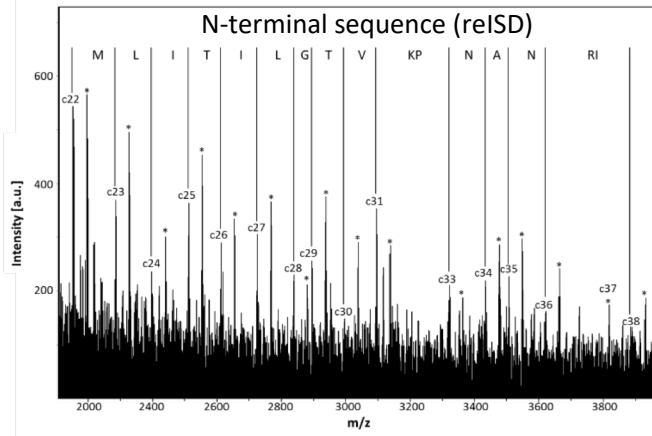

D

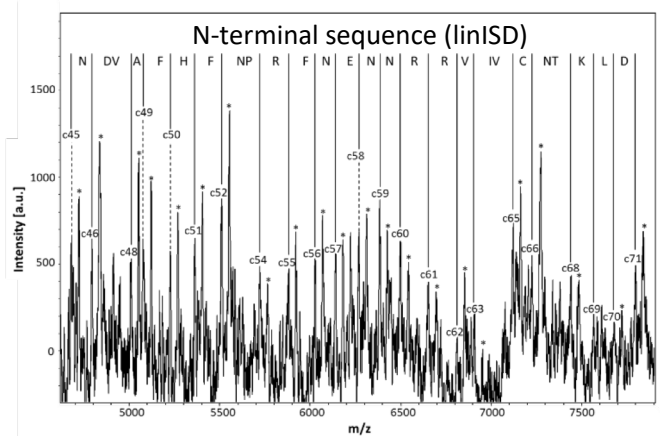

Calculated and experimental masses of c-ions observed in the reISD spectra for Gal-3—8L—Gal-3 with sDHB.

| c-ions | No modifications              |                              | N-terminal acetylation        |                              |
|--------|-------------------------------|------------------------------|-------------------------------|------------------------------|
|        | [MH] <sup>+</sup> (mono) calc | [MH] <sup>+</sup> (mono) exp | [MH] <sup>+</sup> (mono) calc | [MH] <sup>+</sup> (mono) exp |
| c22    | 2153.2                        | 2153.5                       | 2195.3                        | 2195.5                       |
| c23    | 2284.3                        | 2284.5                       | 2326.3                        | 2326.5                       |
| c24    | 2397.4                        | 2397.6                       | 2439.4                        | 2439.6                       |
| c25    | 2510.5                        | 2510.8                       | 2552.5                        | 2552.6                       |
| c26    | 2611.5                        | 2611.8                       | 2653.5                        | 2653.7                       |
| c27    | 2724.6                        | 2723.6                       | 2766.6                        | 2766.8                       |
| c28    | 2837.7                        | _*                           | 2879.7                        | 2879.9                       |
| c29    | 2894.7                        | 2895.0                       | 2936.7                        | 2936.9                       |
| c30    | 2995.8                        | 2996.0                       | 3037.8                        | 3037.1                       |
| c31    | 3094.8                        | 3094.9                       | 3136.8                        | _*                           |
| c32    | 3222.9                        | _*                           | 3264.9                        | _*                           |
| c33    | 3320.0                        | 3320.2                       | 3362.0                        | _*                           |
| c34    | 3434.0                        | 3434.2                       | 3476.0                        | 3476.4                       |
| c35    | 3505.0                        | 3505.3                       | 3547.0                        | 3547.5                       |
| c36    | 3619.1                        | 3619.5                       | 3661.1                        | _*                           |
| c37    | 3775.2                        | _*                           | 3817.2                        | _*                           |
| c38    | 3888.3                        | _*                           | 3930.3                        | 3929.7                       |
| c39    | 3959.3                        | 3959.9                       | 4001.3                        | _*                           |
| c40    | 4072.4                        | 4072.7                       | 4114.4                        | _*                           |
| c41    | 4187.4                        | 4187.9                       | 4229.4                        | 4229.3                       |
| c42    | 4334.5                        | 4334.7                       | 4376.5                        | _*                           |
| c43    | 4462.6                        | 4462.5                       | 4504.6                        | 4505.3                       |
| c44    | 4618.6                        | _*                           | 4660.7                        | _*                           |
| c45    | 4675.7                        | 4676.5                       | 4717.7                        | 4718.1                       |
| c46    | 4789.7                        | 4789.6                       | 4831.7                        | _*                           |
| c47    | 4904.7                        | _*                           | 4946.8                        | _*                           |
| c48    | 5003.8                        | 5004.5                       | 5045.8                        | _*                           |
| c49    | 5074.8                        | 5075.0                       | 5116.9                        | _*                           |

\*c-ions not observed

Calculated and experimental masses of z+2-ions observed in the reISD spectra for Gal-3—8L—Gal-3.

| z+2-ions | [MH] <sup>+</sup> (mono) calc | [MH] <sup>+</sup> (mono) exp |
|----------|-------------------------------|------------------------------|
| z+2 18   | 1870.0                        | 1870.1                       |
| z+2 19   | 1957.0                        | 1957.2                       |
| z+2 20   | 2070.1                        | -*                           |
| z+2 21   | 2199.1                        | -*                           |
| z+2 22   | 2313.2                        | 2313.4                       |
| z+2 23   | 2426.2                        | 2426.4                       |
| z+2 24   | 2554.3                        | -*                           |
| z+2 25   | 2682.4                        | 2681.9                       |
| z+2 26   | 2781.5                        | -*                           |
| z+2 27   | 2937.6                        | 2938.0                       |
| z+2 28   | 3074.6                        | 3074.9                       |
| z+2 29   | 3188.7                        | 3189.1                       |
| z+2 30   | 3351.8                        | 3352.1                       |
| z+2 31   | 3479.8                        | -*                           |
| z+2 32   | 3592.8                        | 3593.3                       |
| z+2 33   | 3706.0                        | 3706.4                       |
| z+2 34   | 3843.0                        | 3843.6                       |
| z+2 35   | 3914.1                        | 3914.5                       |
| z+2 36   | 4029.1                        | 4029.5                       |
| z+2 37   | 4143.2                        | 4143.9                       |
| z+2 38   | 4242.2                        | -*                           |
| z+2 39   | 4313.3                        | 4314.1                       |
| z+2 40   | 4412.3                        | -*                           |
| z+2 41   | 4540.4                        | 4540.2                       |
| z+2 42   | 4687.5                        | 4687.8                       |
| z+2 43   | 4824.6                        | -*                           |
| z+2 44   | 4939.6                        | -*                           |
| z+2 45   | 5036.6                        | -*                           |
| z+2 46   | 5165.7                        | 5166.1                       |
| z+2 47   | 5264.7                        | 5265.4                       |

\*z+2-ions not observed

Calculated and experimental masses of y-ions observed in the reISD spectra for Gal-3—8L—Gal-3.

| y-ions | [MH] <sup>+</sup> (mono) calc | [MH] <sup>+</sup> (mono) exp |
|--------|-------------------------------|------------------------------|
| y18    | 1885.0                        | 1885.2                       |
| y19    | 1972.0                        | 1972.2                       |
| y20    | 2085.1                        | 2085.2                       |
| y21    | 2214.1                        | 2214.4                       |
| y22    | 2328.2                        | -*                           |
| y23    | 2441.2                        | -*                           |
| y24    | 2569.3                        | -*                           |
| y25    | 2697.4                        | -*                           |
| y26    | 2796.5                        | -*                           |
| y27    | 2952.6                        | 2952.9                       |
| y28    | 3089.7                        | 3090.1                       |
| y29    | 3203.7                        | 3204.0                       |
| y30    | 3366.8                        | -*                           |
| y31    | 3494.8                        | -*                           |
| y32    | 3607.9                        | -*                           |
| y33    | 3721.0                        | -*                           |
| y34    | 3858.0                        | -*                           |
| y35    | 3929.1                        | 3929.7                       |
| y36    | 4044.1                        | -*                           |
| y37    | 4158.2                        | -*                           |
| y38    | 4257.2                        | -*                           |
| y39    | 4328.3                        | 4328.0                       |
| y40    | 4427.3                        | 4427.4                       |
| y41    | 4555.4                        | 4555.0                       |
| y42    | 4702.5                        | 4703.2                       |
| y43    | 4839.6                        | 4840.3                       |
| y44    | 4954.6                        | -*                           |
| y45    | 5051.6                        | 5051.8                       |
| y46    | 5180.7                        | 5181.0                       |

\*y-ions not observed

Calculated and experimental masses of c-ions observed in the reISD spectra for Gal-3—8L—Gal-3 with SA.

| c-ions | No modification               |                              | N-terminal acetylation        |                              |
|--------|-------------------------------|------------------------------|-------------------------------|------------------------------|
|        | [MH] <sup>+</sup> (mono) calc | [MH] <sup>+</sup> (mono) exp | [MH] <sup>+</sup> (mono) calc | [MH] <sup>+</sup> (mono) exp |
| c22    | 2153.2                        | 2153.4                       | 2195.3                        | 2195.5                       |
| c23    | 2284.3                        | 2284.4                       | 2326.3                        | 2326.3                       |
| c24    | 2397.4                        | 2396.8                       | 2439.4                        | 2439.5                       |
| c25    | 2510.5                        | 2510.6                       | 2552.5                        | 2552.8                       |
| c26    | 2611.5                        | 2611.6                       | 2653.5                        | 2653.5                       |
| c27    | 2724.6                        | 2724.7                       | 2766.6                        | 2766.7                       |
| c28    | 2837.7                        | 2837.8                       | 2879.7                        | 2879.7                       |
| c29    | 2894.7                        | 2894.7                       | 2936.7                        | 2936.7                       |
| c30    | 2995.8                        | 2995.9                       | 3037.8                        | 3037.7                       |
| c31    | 3094.8                        | 3094.8                       | 3136.8                        | 3136.8                       |
| c32    | 3222.9                        | -*                           | 3264.9                        | -*                           |
| c33    | 3320.0                        | 3320.0                       | 3362.0                        | 3361.8                       |
| c34    | 3434.0                        | 3434.0                       | 3476.0                        | 3475.9                       |
| c35    | 3505.0                        | 3505.0                       | 3547.1                        | 3547.1                       |
| c36    | 3619.1                        | 3619.9                       | 3661.1                        | 3661.0                       |
| c37    | 3775.2                        | -*                           | 3817.2                        | 3817.0                       |
| c38    | 3888.3                        | 3888.3                       | 3930.3                        | 3929.8                       |

\*c-ions not observed

Calculated and experimental masses of c-ions observed in the linISD spectra for Gal-3—8L—Gal-3 wt with SA.

| c-ions | No modification             |                            | N-terminal acetylation      |                            |
|--------|-----------------------------|----------------------------|-----------------------------|----------------------------|
|        | [MH] <sup>+</sup> (av) calc | [MH] <sup>+</sup> (av) exp | [MH] <sup>+</sup> (av) calc | [MH] <sup>+</sup> (av) exp |
| c45    | 4678.6                      | 4679.5                     | 4720.6                      | 4720.9                     |
| c46    | 4792.7                      | 4793.5                     | 4834.7                      | 4835.9                     |
| c47    | 4907.8                      | -*                         | 4949.8                      | 4949.3                     |
| c48    | 5006.9                      | 5005.7                     | 5048.9                      | -*                         |
| c49    | 5078.0                      | 5079.8                     | 5120.0                      | 5120.6                     |
| c50    | 5225.2                      | 5225.5                     | 5267.2                      | 5267.4                     |
| c51    | 5362.3                      | 5361.8                     | 5404.3                      | 5404.4                     |
| c52    | 5509.5                      | 5509.0                     | 5551.5                      | 5553.3                     |
| c53    | 5623.6                      | -*                         | 5665.6                      | -*                         |
| c54    | 5720.7                      | 5721.4                     | 5762.7                      | 5763.4                     |
| c55    | 5876.9                      | 5877.1                     | 5918.9                      | 5918.7                     |
| c56    | 6024.0                      | 6025.0                     | 6066.1                      | 6065.7                     |
| c57    | 6138.2                      | 6139.9                     | 6180.2                      | 6180.9                     |
| c58    | 6267.3                      | 6268.6                     | 6309.3                      | 6309.3                     |
| c59    | 6381.4                      | 6381.1                     | 6423.4                      | 6421.5                     |
| c60    | 6495.5                      | 6493.9                     | 6537.5                      | 6539.4                     |
| c61    | 6651.6                      | 6650.2                     | 6693.7                      | 6695.0                     |
| c62    | 6807.8                      | 6809.1                     | 6849.9                      | -*                         |
| c63    | 6907.0                      | 6907.1                     | 6949.0                      | -*                         |
| c64    | 7020.1                      | -*                         | 7062.2                      | -*                         |
| c65    | 7119.3                      | 7117.8                     | 7161.3                      | -*                         |
| c66    | 7222.4                      | 7222.3                     | 7264.4                      | -*                         |
| c67    | 7336.5                      | -*                         | 7378.5                      | 7380.1                     |
| c68    | 7437.6                      | 7439.1                     | 7479.6                      | 7480.2                     |
| c69    | 7565.8                      | 7563.9                     | 7607.8                      | -*                         |
| c70    | 7678.9                      | 7678.0                     | 7721.0                      | 7720.9                     |
| c71    | 7794.0                      | 7793.0                     | 7836.1                      | 7836.5                     |

\*c-ions not observed

# Gal-3—Gal-1

A

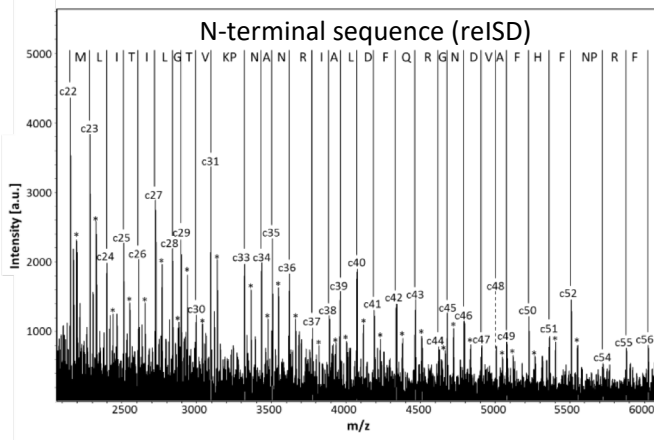

B

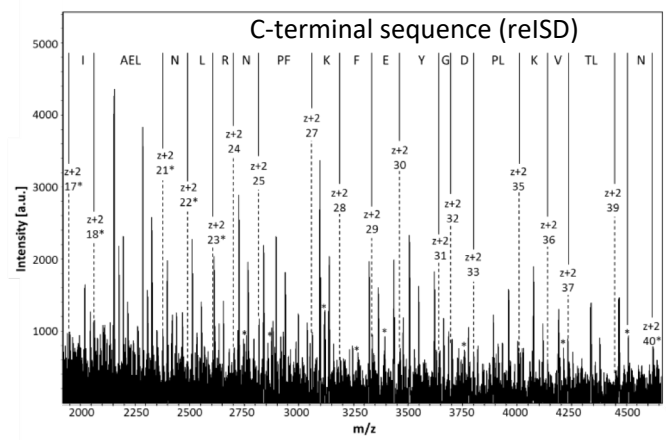

C

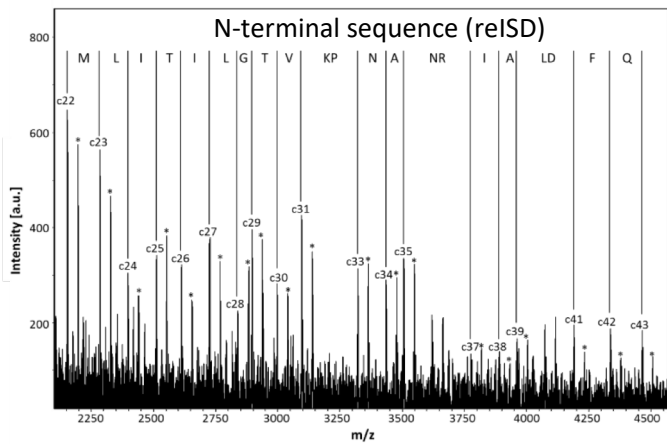

D

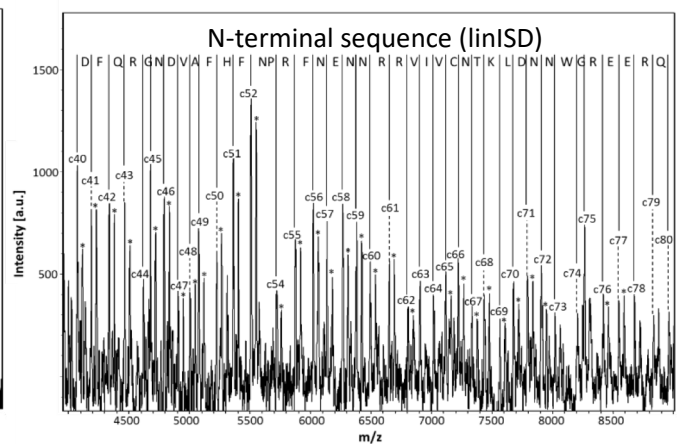



Calculated and experimental masses of c-ions observed in the reISD spectra for Gal-3—Gal-1 with sDHB.

| c-ions | No modifications            |                            | N-terminal acetylation      |                            |
|--------|-----------------------------|----------------------------|-----------------------------|----------------------------|
|        | [MH] <sup>+</sup> (av) calc | [MH] <sup>+</sup> (av) exp | [MH] <sup>+</sup> (av) calc | [MH] <sup>+</sup> (av) exp |
| c22    | 2154.6                      | 2154.6                     | 2196.6                      | 2196.6                     |
| c23    | 2285.8                      | 2285.1                     | 2327.8                      | 2327.7                     |
| c24    | 2398.9                      | 2398.7                     | 2441.0                      | 2440.7                     |
| c25    | 2512.1                      | 2511.8                     | 2554.1                      | 2554.1                     |
| c26    | 2613.2                      | 2612.8                     | 2655.2                      | 2654.7                     |
| c27    | 2726.4                      | 2727.0                     | 2768.4                      | 2768.8                     |
| c28    | 2839.5                      | 2840.0                     | 2881.6                      | 2882.0                     |
| c29    | 2896.6                      | 2896.9                     | 2938.6                      | 2938.8                     |
| c30    | 2997.7                      | 2997.6                     | 3039.7                      | 3039.9                     |
| c31    | 3096.8                      | 3097.1                     | 3138.8                      | 3139.2                     |
| c32    | 3225.0                      | _*                         | 3267.0                      | _*                         |
| c33    | 3322.1                      | 3322.4                     | 3364.1                      | 3364.2                     |
| c34    | 3436.2                      | 3436.2                     | 3478.2                      | 3478.4                     |
| c35    | 3507.3                      | 3507.4                     | 3549.3                      | 3549.3                     |
| c36    | 3621.4                      | 3621.2                     | 3663.4                      | 3663.6                     |
| c37    | 3777.6                      | 3777.2                     | 3819.6                      | 3820.1                     |
| c38    | 3890.7                      | 3890.8                     | 3932.8                      | 3932.6                     |
| c39    | 3961.8                      | 3961.7                     | 4003.8                      | 4003.6                     |
| c40    | 4075.0                      | 4074.9                     | 4117.0                      | 4118.0                     |
| c41    | 4190.0                      | 4189.8                     | 4232.1                      | 4232.2                     |
| c42    | 4337.2                      | 4337.8                     | 4379.2                      | 4378.8                     |
| c43    | 4465.3                      | 4465.8                     | 4507.4                      | 4508.1                     |
| c44    | 4621.5                      | 4621.4                     | 4663.6                      | 4663.1                     |
| c45    | 4678.6                      | 4679.0                     | 4720.6                      | 4721.4                     |
| c46    | 4792.7                      | _*                         | 4834.7                      | 4834.3                     |
| c47    | 4907.8                      | 4908.5                     | 4949.8                      | _*                         |
| c48    | 5006.9                      | 5007.0                     | 5048.9                      | 5049.8                     |
| c49    | 5078.0                      | 5077.9                     | 5120.0                      | 5120.8                     |
| c50    | 5225.2                      | 5225.8                     | 5267.2                      | _*                         |
| c51    | 5362.3                      | 5363.2                     | 5404.3                      | _*                         |
| c52    | 5509.5                      | 5510.4                     | 5551.5                      | 5552.2                     |
| c53    | 5623.6                      | _*                         | 5665.6                      | _*                         |
| c54    | 5720.7                      | 5720.5                     | 5762.7                      | _*                         |
| c55    | 5876.9                      | 5876.5                     | 5918.9                      | _*                         |
| c56    | 6024.0                      | 6023.8                     | 6066.1                      | _*                         |

\*c-ions not observed

**Calculated and experimental masses of z+2-ions observed in the reISD spectra for Gal-3—Gal-1**

| c-ions | No modification             |                            | C306- carbamidomethylation  |                            |
|--------|-----------------------------|----------------------------|-----------------------------|----------------------------|
|        | [MH] <sup>+</sup> (av) calc | [MH] <sup>+</sup> (av) exp | [MH] <sup>+</sup> (av) calc | [MH] <sup>+</sup> (av) exp |
| z+2 17 | 1894.2                      | .*                         | 1951.2                      | 1951.2                     |
| z+2 18 | 2007.3                      | .*                         | 2064.4                      | 2063.8                     |
| z+2 19 | 2078.4                      | .*                         | 2135.4                      | .*                         |
| z+2 20 | 2207.4                      | .*                         | 2264.6                      | .*                         |
| z+2 21 | 2320.7                      | .*                         | 2377.7                      | 2377.5                     |
| z+2 22 | 2434.8                      | .*                         | 2491.8                      | 2491.3                     |
| z+2 23 | 2547.9                      | .*                         | 2605.0                      | 2604.5                     |
| z+2 24 | 2704.1                      | 2704.5                     | 2761.2                      | 2760.5                     |
| z+2 25 | 2818.2                      | 2817.6                     | 2875.3                      | 2874.6                     |
| z+2 26 | 2915.3                      | .*                         | 2972.4                      | .*                         |
| z+2 27 | 3062.5                      | 3062.5                     | 3119.6                      | 3119.5                     |
| z+2 28 | 3190.7                      | 3190.7                     | 3247.7                      | 3247.4                     |
| z+2 29 | 3337.9                      | 3337.9                     | 3394.9                      | 3394.1                     |
| z+2 30 | 3467.0                      | 3466.5                     | 3524.0                      | .*                         |
| z+2 31 | 3630.1                      | 3630.1                     | 3687.2                      | 3686.9                     |
| z+2 32 | 3687.2                      | 3686.9                     | 3744.2                      | 3743.6                     |
| z+2 33 | 3802.3                      | 3802.7                     | 3859.3                      | .*                         |
| z+2 34 | 3899.4                      | .*                         | 3956.4                      | .*                         |
| z+2 35 | 4012.6                      | 4012.4                     | 4069.6                      | .*                         |
| z+2 36 | 4140.7                      | 4141.0                     | 4197.8                      | 4197.5                     |
| z+2 37 | 4239.9                      | 4239.5                     | 4296.9                      | .*                         |
| z+2 38 | 4341.0                      | .*                         | 4398.0                      | .*                         |
| z+2 39 | 4454.1                      | 4453.5                     | 4511.2                      | 4510.5                     |
| z+2 40 | 4568.2                      | .*                         | 4625.3                      | 4624.7                     |

\*z+2-ions not observed

Calculated and experimental masses of c-ions observed in the reISD spectra for Gal-3—Gal-1 with SA.

| c-ions | No modification               |                              | N-terminal acetylation        |                              |
|--------|-------------------------------|------------------------------|-------------------------------|------------------------------|
|        | [MH] <sup>+</sup> (mono) calc | [MH] <sup>+</sup> (mono) exp | [MH] <sup>+</sup> (mono) calc | [MH] <sup>+</sup> (mono) exp |
| c22    | 2153.2                        | 2153.4                       | 2195.3                        | 2195.4                       |
| c23    | 2284.3                        | 2284.5                       | 2326.3                        | 2326.4                       |
| c24    | 2397.4                        | 2397.6                       | 2439.4                        | 2439.8                       |
| c25    | 2510.5                        | 2510.7                       | 2552.5                        | 2552.6                       |
| c26    | 2611.5                        | 2611.6                       | 2653.5                        | 2653.7                       |
| c27    | 2724.6                        | 2724.6                       | 2766.6                        | 2766.6                       |
| c28    | 2837.7                        | 2837.7                       | 2879.7                        | 2880.0                       |
| c29    | 2894.7                        | 2894.7                       | 2936.7                        | 2936.8                       |
| c30    | 2995.8                        | 2995.8                       | 3037.8                        | 3037.8                       |
| c31    | 3094.8                        | 3094.8                       | 3136.8                        | 3136.8                       |
| c32    | 3222.9                        | _*                           | 3264.9                        | _*                           |
| c33    | 3320.0                        | 3319.9                       | 3362.0                        | 3362.4                       |
| c34    | 3434.0                        | 3434.2                       | 3476.0                        | 3476.0                       |
| c35    | 3505.0                        | 3505.0                       | 3547.1                        | 3547.0                       |
| c36    | 3619.1                        | _*                           | 3661.1                        | _*                           |
| c37    | 3775.2                        | 3775.4                       | 3817.2                        | 3817.4                       |
| c38    | 3888.3                        | 3888.6                       | 3930.3                        | 3930.9                       |
| c39    | 3959.3                        | 3959.1                       | 4001.3                        | 4001.6                       |
| c40    | 4072.4                        | _*                           | 4114.4                        | _*                           |
| c41    | 4187.4                        | 4187.5                       | 4229.4                        | 4229.8                       |
| c42    | 4334.5                        | 4334.4                       | 4376.5                        | 4376.6                       |
| c43    | 4462.6                        | 4463.2                       | 4504.6                        | 4505.0                       |

\*c-ions not observed

Calculated and experimental masses of c-ions observed in the linSD spectra for Gal-3—Gal-1 with SA.

| c-ions | No modification             |                            | N-terminal acetylation      |                            |
|--------|-----------------------------|----------------------------|-----------------------------|----------------------------|
|        | [MH] <sup>+</sup> (av) calc | [MH] <sup>+</sup> (av) exp | [MH] <sup>+</sup> (av) calc | [MH] <sup>+</sup> (av) exp |
| c42    | 4337.2                      | 4337.5                     | 4379.2                      | 4379.2                     |
| c43    | 4465.3                      | 4465.0                     | 4507.4                      | 4506.7                     |
| c44    | 4621.5                      | 4622.3                     | 4663.6                      | -*                         |
| c45    | 4678.6                      | 4677.4                     | 4720.6                      | 4720.6                     |
| c46    | 4792.7                      | 4792.1                     | 4834.7                      | 4835.0                     |
| c47    | 4907.8                      | 4906.4                     | 4949.8                      | 4949.5                     |
| c48    | 5006.9                      | 5007.2                     | 5048.9                      | 5048.8                     |
| c49    | 5078.0                      | 5077.3                     | 5120.0                      | 5120.0                     |
| c50    | 5225.2                      | 5226.1                     | 5267.2                      | 5268.0                     |
| c51    | 5362.3                      | 5362.7                     | 5404.3                      | 5404.9                     |
| c52    | 5509.5                      | 5509.3                     | 5551.5                      | 5551.8                     |
| c53    | 5623.6                      | -*                         | 5665.6                      | -*                         |
| c54    | 5720.7                      | 5721.4                     | 5762.7                      | 5762.6                     |
| c55    | 5876.9                      | 5876.7                     | 5918.9                      | 5918.7                     |
| c56    | 6024.0                      | 6024.0                     | 6066.1                      | 6065.8                     |
| c57    | 6138.2                      | 6137.8                     | 6180.2                      | 6179.4                     |
| c58    | 6267.3                      | 6267.6                     | 6309.3                      | 6310.2                     |
| c59    | 6381.4                      | 6381.6                     | 6423.4                      | 6424.3                     |
| c60    | 6495.5                      | 6496.1                     | 6537.5                      | 6537.6                     |
| c61    | 6651.6                      | 6650.7                     | 6693.7                      | 6694.3                     |
| c62    | 6807.8                      | 6808.7                     | 6849.9                      | 6849.3                     |
| c63    | 6907.0                      | 6906.5                     | 6949.0                      | -*                         |
| c64    | 7020.1                      | 7021.2                     | 7062.2                      | -*                         |
| c65    | 7119.3                      | 7120.1                     | 7161.3                      | 7162.2                     |
| c66    | 7222.4                      | 7222.3                     | 7264.4                      | 7264.3                     |
| c67    | 7336.5                      | 7336.1                     | 7378.5                      | 7378.0                     |
| c68    | 7437.6                      | 7437.0                     | 7479.6                      | 7478.7                     |
| c69    | 7565.8                      | 7565.9                     | 7607.8                      | 7607.0                     |
| c70    | 7678.9                      | 7677.9                     | 7721.0                      | 7721.8                     |
| c71    | 7794.0                      | 7793.8                     | 7836.1                      | 7836.1                     |
| c72    | 7908.1                      | 7907.6                     | 7950.2                      | 7950.4                     |
| c73    | 8022.2                      | 8022.1                     | 8064.3                      | -*                         |
| c74    | 8208.4                      | 8207.4                     | 8250.5                      | 8249.5                     |
| c75    | 8265.5                      | 8264.9                     | 8307.5                      | -*                         |
| c76    | 8421.7                      | 8421.1                     | 8463.7                      | 8464.3                     |
| c77    | 8550.8                      | 8551.1                     | 8592.8                      | 8592.9                     |
| c78    | 8679.9                      | 8680.0                     | 8722.0                      | -*                         |
| c79    | 8836.1                      | 8836.2                     | 8878.1                      | -*                         |
| c80    | 8964.2                      | 8963.7                     | 9006.3                      | -*                         |

\*c-ions not observed

# Gal-3—8S—Gal-1

A

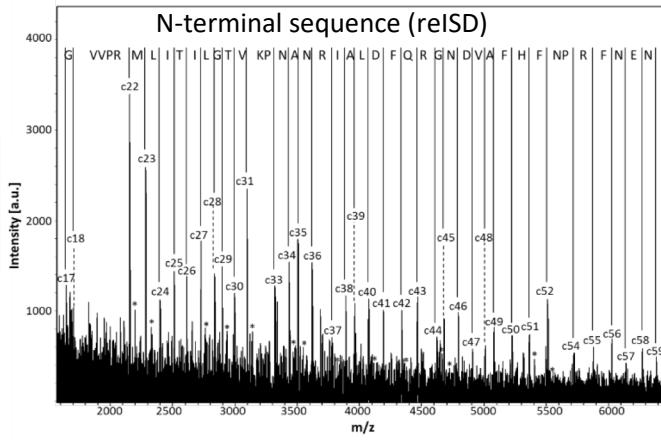

B

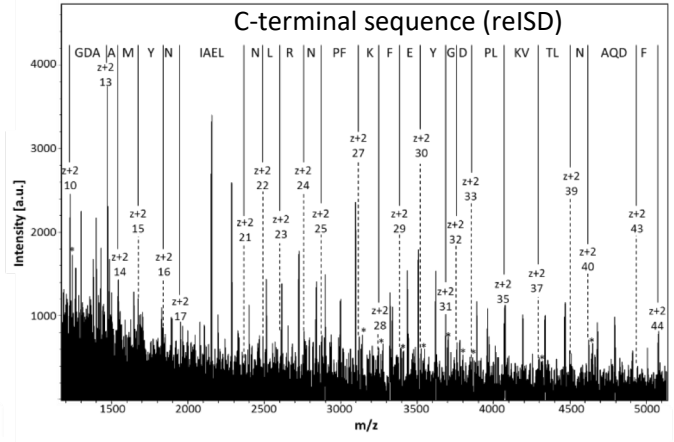

C

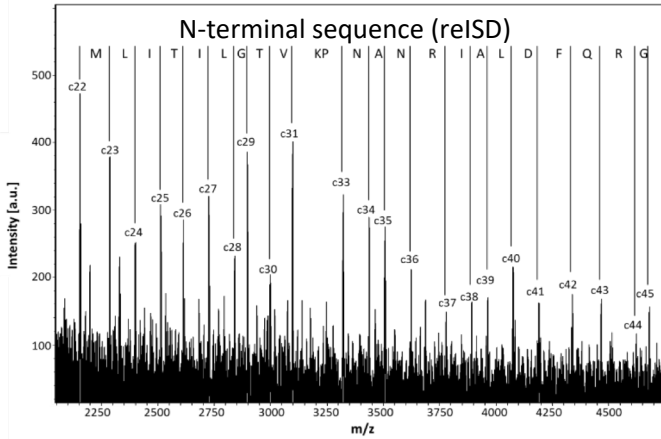

D

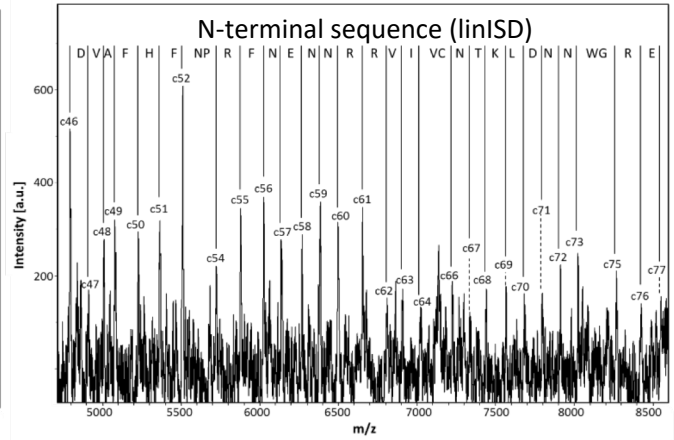

## Calculated and experimental masses of c-ions observed in the reISD spectra for Gal-3—8S—Gal-1 with sDHB.

| c-ions | No modifications            |                            | N-terminal acetylation      |                            |
|--------|-----------------------------|----------------------------|-----------------------------|----------------------------|
|        | [MH] <sup>+</sup> (av) calc | [MH] <sup>+</sup> (av) exp | [MH] <sup>+</sup> (av) calc | [MH] <sup>+</sup> (av) exp |
| c22    | 2154.6                      | 2154.5                     | 2196.6                      | 2196.4                     |
| c23    | 2285.8                      | 2285.6                     | 2327.8                      | 2327.6                     |
| c24    | 2398.9                      | 2398.7                     | 2441.0                      | _*                         |
| c25    | 2512.1                      | 2511.7                     | 2554.1                      | _*                         |
| c26    | 2613.2                      | 2612.7                     | 2655.2                      | _*                         |
| c27    | 2726.4                      | 2726.0                     | 2768.4                      | 2767.8                     |
| c28    | 2839.5                      | 2839.0                     | 2881.6                      | _*                         |
| c29    | 2896.6                      | 2896.2                     | 2938.6                      | 2938.2                     |
| c30    | 2997.7                      | 2997.2                     | 3039.7                      | _*                         |
| c31    | 3096.8                      | 3096.4                     | 3138.8                      | 3139.2                     |
| c32    | 3225.0                      | _*                         | 3267.0                      | _*                         |
| c33    | 3322.1                      | 3322.5                     | 3364.1                      | _*                         |
| c34    | 3436.2                      | 3436.4                     | 3478.2                      | 3478.4                     |
| c35    | 3507.3                      | 3507.4                     | 3549.3                      | 3548.8                     |
| c36    | 3621.4                      | 3621.5                     | 3663.4                      | _*                         |
| c37    | 3777.6                      | 3777.6                     | 3819.6                      | 3819.6                     |
| c38    | 3890.7                      | 3890.4                     | 3932.8                      | _*                         |
| c39    | 3961.8                      | 3961.8                     | 4003.8                      | _*                         |
| c40    | 4075.0                      | 4075.3                     | 4117.0                      | 4117.0                     |
| c41    | 4190.0                      | 4190.2                     | 4232.1                      | _*                         |
| c42    | 4337.2                      | 4337.3                     | 4379.2                      | 4380.1                     |
| c43    | 4465.3                      | 4464.8                     | 4507.4                      | _*                         |
| c44    | 4621.5                      | 4621.6                     | 4663.6                      | 4663.1                     |
| c45    | 4678.6                      | 4678.8                     | 4720.6                      | 4720.7                     |
| c46    | 4792.7                      | 4792.6                     | 4834.7                      | _*                         |
| c47    | 4907.8                      | 4908.1                     | 4949.8                      | _*                         |
| c48    | 5006.9                      | 5006.5                     | 5048.9                      | _*                         |
| c49    | 5078.0                      | 5078.7                     | 5120.0                      | _*                         |
| c50    | 5225.2                      | 5225.9                     | 5267.2                      | _*                         |
| c51    | 5362.3                      | 5363.2                     | 5404.3                      | 5404.5                     |
| c52    | 5509.5                      | 5509.8                     | 5551.5                      | 5551.4                     |
| c53    | 5623.6                      | _*                         | 5665.6                      | _*                         |
| c54    | 5720.7                      | 5720.4                     | 5762.7                      | _*                         |
| c55    | 5876.9                      | 5877.1                     | 5918.9                      | _*                         |
| c56    | 6024.0                      | 6023.6                     | 6066.1                      | _*                         |
| c57    | 6138.2                      | 6138.2                     | 6180.2                      | _*                         |
| c58    | 6267.3                      | 6267.3                     | 6309.3                      | _*                         |
| c59    | 6381.4                      | 6381.4                     | 6423.4                      | _*                         |

\*c-ions not observed

Calculated and experimental masses of z+2-ions observed in the reISD spectra for Gal-3—8S—Gal-1 (C306 carbamidomethylated).

| z+2-ions | [MH] <sup>+</sup> (av) calc | [MH] <sup>+</sup> (av) exp |
|----------|-----------------------------|----------------------------|
| z+2 10   | 1228.4                      | 1228.8                     |
| z+2 11   | 1285.5                      | .*                         |
| z+2 12   | 1400.6                      | .*                         |
| z+2 13   | 1471.6                      | 1471.9                     |
| z+2 14   | 1542.7                      | 1543.0                     |
| z+2 15   | 1673.9                      | 1674.1                     |
| z+2 16   | 1837.1                      | 1837.1                     |
| z+2 17   | 1951.2                      | 1950.6                     |
| z+2 18   | 2064.4                      | .*                         |
| z+2 19   | 2135.4                      | .*                         |
| z+2 20   | 2264.6                      | .*                         |
| z+2 21   | 2377.7                      | 2377.4                     |
| z+2 22   | 2491.8                      | 2491.7                     |
| z+2 23   | 2605.0                      | 2604.6                     |
| z+2 24   | 2761.2                      | 2760.6                     |
| z+2 25   | 2875.3                      | 2874.8                     |
| z+2 26   | 2972.4                      | .*                         |
| z+2 27   | 3119.6                      | 3120.0                     |
| z+2 28   | 3247.7                      | 3247.6                     |
| z+2 29   | 3394.9                      | 3394.9                     |
| z+2 30   | 3524.0                      | 3524.4                     |
| z+2 31   | 3687.2                      | 3686.3                     |
| z+2 32   | 3744.2                      | 3744.5                     |
| z+2 33   | 3859.3                      | 3859.9                     |
| z+2 34   | 3956.4                      | .*                         |
| z+2 35   | 4069.6                      | 4069.6                     |
| z+2 36   | 4197.8                      | .*                         |
| z+2 37   | 4296.9                      | 4297.2                     |
| z+2 38   | 4398.0                      | .*                         |
| z+2 39   | 4511.2                      | 4511.7                     |
| z+2 40   | 4625.3                      | 4624.5                     |
| z+2 41   | 4696.4                      | .*                         |
| z+2 42   | 4824.5                      | .*                         |
| z+2 43   | 4939.6                      | 4939.7                     |
| z+2 44   | 5086.7                      | 5086.3                     |

\*z+2-ions not observed

Calculated and experimental masses of y-ions observed in the reISD spectra for Gal-3—8S—Gal-1 (C306 carbamidomethylated)

| y-ions | [MH] <sup>+</sup> (av) calc | [MH] <sup>+</sup> (av) exp |
|--------|-----------------------------|----------------------------|
| y10    | 1243.5                      | 1242.8                     |
| y11    | 1300.5                      | 1300.9                     |
| y12    | 1415.6                      | .*                         |
| y13    | 1486.7                      | 1486.9                     |
| y14    | 1557.8                      | .*                         |
| y15    | 1688.9                      | .*                         |
| y16    | 1852.1                      | .*                         |
| y17    | 1966.2                      | .*                         |
| y18    | 2079.4                      | 2079.3                     |
| y19    | 2150.4                      | .*                         |
| y20    | 2279.6                      | .*                         |
| y21    | 2392.7                      | .*                         |
| y22    | 2506.8                      | .*                         |
| y23    | 2620.0                      | .*                         |
| y24    | 2776.2                      | .*                         |
| y25    | 2890.3                      | .*                         |
| y26    | 2987.4                      | 2987.7                     |
| y27    | 3134.6                      | 3134.8                     |
| y28    | 3262.7                      | 3262.0                     |
| y29    | 3409.9                      | 3410.2                     |
| y30    | 3539.0                      | 3539.4                     |
| y31    | 3702.2                      | 3702.2                     |
| y32    | 3759.2                      | 3759.5                     |
| y33    | 3874.3                      | 3874.5                     |
| y34    | 3971.5                      | 3971.7                     |
| y35    | 4084.6                      | .*                         |
| y36    | 4212.8                      | .*                         |
| y37    | 4311.9                      | 4312.2                     |
| y38    | 4413.0                      | .*                         |
| y39    | 4526.2                      | .*                         |
| y40    | 4640.3                      | 4640.3                     |

\*y-ions not observed

Calculated and experimental masses of c-ions observed in the reISD spectra for Gal-3—8S—Gal-1 with SA.

|        | No modification             |                            |
|--------|-----------------------------|----------------------------|
| c-ions | [MH] <sup>+</sup> (av) calc | [MH] <sup>+</sup> (av) exp |
| c22    | 2154.6                      | 2154.6                     |
| c23    | 2285.8                      | 2286.4                     |
| c24    | 2398.9                      | 2399.6                     |
| c25    | 2512.1                      | 2512.3                     |
| c26    | 2613.2                      | 2614.0                     |
| c27    | 2726.4                      | 2725.8                     |
| c28    | 2839.5                      | 2840.2                     |
| c29    | 2896.6                      | 2897.1                     |
| c30    | 2997.7                      | 2997.9                     |
| c31    | 3096.8                      | 3097.3                     |
| c32    | 3225.0                      | -*                         |
| c33    | 3322.1                      | 3322.5                     |
| c34    | 3436.2                      | 3437.1                     |
| c35    | 3507.3                      | 3506.7                     |
| c36    | 3621.4                      | 3622.1                     |
| c37    | 3777.6                      | 3777.2                     |
| c38    | 3890.7                      | 3891.3                     |
| c39    | 3961.8                      | 3962.5                     |
| c40    | 4075.0                      | 4074.6                     |
| c41    | 4190.0                      | 4190.7                     |
| c42    | 4337.2                      | 4336.7                     |
| c43    | 4465.3                      | 4465.7                     |
| c44    | 4621.5                      | 4622.3                     |
| c45    | 4678.6                      | 4678.7                     |

\*c-ions not observed



Calculated and experimental masses of c-ions observed in the linISD spectra for Gal-3—8S—Gal-1 with SA.

| c-ions | No modification             |                            |
|--------|-----------------------------|----------------------------|
|        | [MH] <sup>+</sup> (av) calc | [MH] <sup>+</sup> (av) exp |
| c39    | 3961.8                      | 3962.1                     |
| c40    | 4075.0                      | 4075.2                     |
| c41    | 4190.0                      | 4191.2                     |
| c42    | 4337.2                      | 4338.4                     |
| c43    | 4465.3                      | 4466.4                     |
| c44    | 4621.5                      | .*                         |
| c45    | 4678.6                      | .*                         |
| c46    | 4792.7                      | 4793.9                     |
| c47    | 4907.8                      | 4909.0                     |
| c48    | 5006.9                      | 5006.5                     |
| c49    | 5078.0                      | 5076.7                     |
| c50    | 5225.2                      | 5224.4                     |
| c51    | 5362.3                      | 5361.7                     |
| c52    | 5509.5                      | 5510.5                     |
| c53    | 5623.6                      | .*                         |
| c54    | 5720.7                      | 5722.5                     |
| c55    | 5876.9                      | 5878.7                     |
| c56    | 6024.0                      | 6025.2                     |
| c57    | 6138.2                      | 6138.6                     |
| c58    | 6267.3                      | 6267.8                     |
| c59    | 6381.4                      | 6381.4                     |
| c60    | 6495.5                      | 6496.1                     |
| c61    | 6651.6                      | 6652.2                     |
| c62    | 6807.8                      | 6807.6                     |
| c63    | 6907.0                      | 6908.0                     |
| c64    | 7020.1                      | 7019.6                     |
| c65    | 7119.3                      | .*                         |
| c66    | 7222.4                      | 7222.4                     |
| c67    | 7336.5                      | 7335.0                     |
| c68    | 7437.6                      | 7437.3                     |
| c69    | 7565.8                      | 7567.0                     |
| c70    | 7678.9                      | 7680.6                     |
| c71    | 7794.0                      | 7795.0                     |
| c72    | 7908.1                      | 7909.5                     |
| c73    | 8022.2                      | 8022.3                     |
| c74    | 8208.4                      | .*                         |
| c75    | 8265.5                      | 8266.6                     |
| c76    | 8421.7                      | 8419.9                     |
| c77    | 8550.8                      | 8550.7                     |

\*c-ions not observed

# Gal-1—Gal-3

A

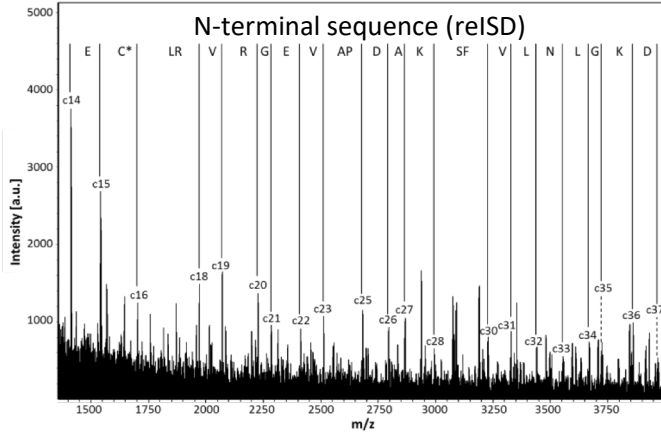

B

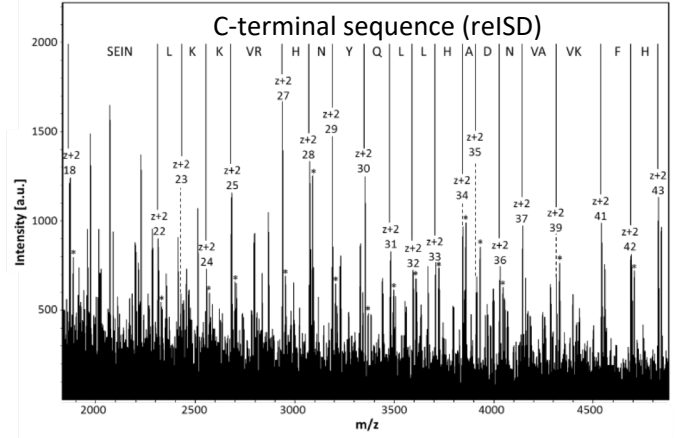

C

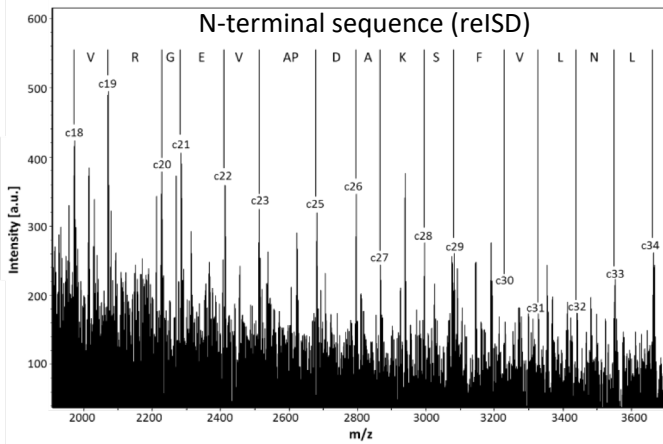

D

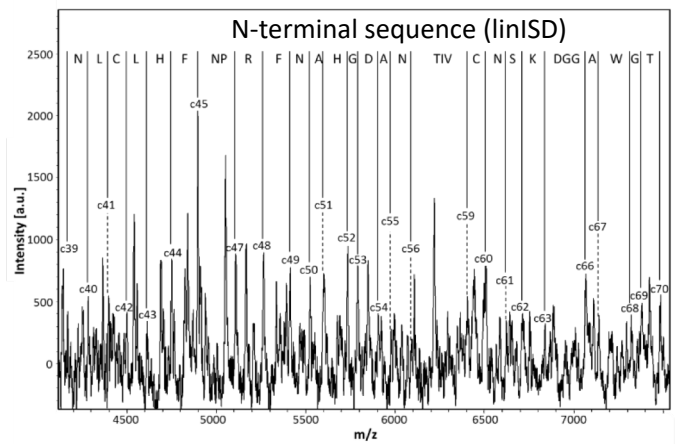

Calculated and experimental masses of c-ions observed in the reISD spectra for Gal-1—Gal-3 with sDHB.

|        | C2 and C16 - carbamidomethylation |                            |
|--------|-----------------------------------|----------------------------|
| c-ions | [MH] <sup>+</sup> (av) calc       | [MH] <sup>+</sup> (av) exp |
| c14    | 1413.7                            | 1413.0                     |
| c15    | 1542.8                            | 1542.0                     |
| c16    | 1703.0                            | 1703.1                     |
| c17    | 1816.1                            | .*                         |
| c18    | 1972.3                            | 1972.3                     |
| c19    | 2071.4                            | 2071.3                     |
| c20    | 2227.6                            | 2227.5                     |
| c21    | 2284.7                            | 2284.6                     |
| c22    | 2413.8                            | 2413.5                     |
| c23    | 2512.9                            | 2512.5                     |
| c24    | 2584.0                            | .*                         |
| c25    | 2681.1                            | 2681.2                     |
| c26    | 2796.2                            | 2796.5                     |
| c27    | 2867.3                            | 2867.2                     |
| c28    | 2995.5                            | 2994.9                     |
| c29    | 3082.5                            | .*                         |
| c30    | 3229.7                            | 3229.2                     |
| c31    | 3328.9                            | 3328.8                     |
| c32    | 3442.0                            | 3442.0                     |
| c33    | 3556.1                            | 3556.1                     |
| c34    | 3669.3                            | 3669.2                     |
| c35    | 3726.3                            | 3726.5                     |
| c36    | 3854.5                            | 3854.4                     |
| c37    | 3969.6                            | 3969.8                     |

\*c-ions not observed

Calculated and experimental masses of z+2-ions observed in the reISD spectra for Gal-1—Gal-3.

| z+2-ions | [MH] <sup>+</sup> (mono) calc | [MH] <sup>+</sup> (mono) exp |
|----------|-------------------------------|------------------------------|
| z+2 18   | 1871.1                        | 1871.1                       |
| z+2 19   | 1958.2                        | .*                           |
| z+2 20   | 2071.3                        | 2071.3                       |
| z+2 21   | 2200.4                        | .*                           |
| z+2 22   | 2314.6                        | 2314.4                       |
| z+2 23   | 2427.7                        | 2427.6                       |
| z+2 24   | 2555.9                        | 2555.8                       |
| z+2 25   | 2684.1                        | 2683.6                       |
| z+2 26   | 2783.2                        | .*                           |
| z+2 27   | 2939.4                        | 2939.7                       |
| z+2 28   | 3076.6                        | 3076.2                       |
| z+2 29   | 3190.6                        | 3191.0                       |
| z+2 30   | 3353.8                        | 3354.0                       |
| z+2 31   | 3482.0                        | 3482.2                       |
| z+2 32   | 3595.1                        | 3595.4                       |
| z+2 33   | 3708.3                        | 3708.5                       |
| z+2 34   | 3845.4                        | 3845.4                       |
| z+2 35   | 3916.5                        | 3917.0                       |
| z+2 36   | 4031.6                        | 4031.7                       |
| z+2 37   | 4145.7                        | 4145.4                       |
| z+2 38   | 4244.8                        | .*                           |
| z+2 39   | 4315.9                        | 4315.6                       |
| z+2 40   | 4415.0                        | .*                           |
| z+2 41   | 4543.2                        | 4543.1                       |
| z+2 42   | 4690.4                        | 4691.2                       |
| z+2 43   | 4827.5                        | 4828.0                       |

\*z+2-ions not observed

Calculated and experimental masses of y-ions observed in the reISD spectra for Gal-1—Gal-3.

| y-ions | [MH] <sup>+</sup> (mono) calc | [MH] <sup>+</sup> (mono) exp |
|--------|-------------------------------|------------------------------|
| y17    | 1758.0                        | 1758.1                       |
| y18    | 1886.2                        | 1886.3                       |
| y19    | 1973.2                        | 1973.3                       |
| y20    | 2086.4                        | .*                           |
| y21    | 2215.5                        | 2215.6                       |
| y22    | 2329.6                        | 2329.4                       |
| y23    | 2442.7                        | .*                           |
| y24    | 2570.9                        | 2571.2                       |
| y25    | 2699.1                        | 2698.6                       |
| y26    | 2798.2                        | .*                           |
| y27    | 2954.4                        | 2954.7                       |
| y28    | 3091.6                        | 3091.8                       |
| y29    | 3205.8                        | 3206.0                       |
| y30    | 3368.8                        | 3369.3                       |
| y31    | 3497.0                        | 3497.1                       |
| y32    | 3610.1                        | 3610.2                       |
| y33    | 3723.3                        | 3723.7                       |
| y34    | 3860.4                        | 3860.6                       |
| y35    | 3931.5                        | 3931.4                       |
| y36    | 4046.6                        | 4046.4                       |
| y37    | 4160.7                        | .*                           |
| y38    | 4259.8                        | .*                           |
| y39    | 4330.9                        | 4331.0                       |
| y40    | 4430.0                        | .*                           |
| y41    | 4558.2                        | .*                           |
| y42    | 4705.4                        | 4705.3                       |

\*y-ions not observed

Calculated and experimental masses of c-ions observed in the reISD spectra for Gal-1—Gal-3 with SA.

| C2 and C16 - carbamidomethylation |                             |                              |
|-----------------------------------|-----------------------------|------------------------------|
| c-ions                            | [MH] <sup>+</sup> (av) calc | [MH] <sup>+</sup> (mono) exp |
| c18                               | 1972.3                      | 1972.2                       |
| c19                               | 2071.4                      | 2071.3                       |
| c20                               | 2227.6                      | 2227.5                       |
| c21                               | 2284.7                      | 2284.7                       |
| c22                               | 2413.8                      | 2413.5                       |
| c23                               | 2512.9                      | 2512.6                       |
| c24                               | 2584.0                      | —*                           |
| c25                               | 2681.1                      | 2681.5                       |
| c26                               | 2796.2                      | 2795.9                       |
| c27                               | 2867.3                      | 2866.9                       |
| c28                               | 2995.5                      | 2995.8                       |
| c29                               | 3082.5                      | 3083.0                       |
| c30                               | 3229.7                      | 3230.3                       |
| c31                               | 3328.9                      | 3329.1                       |
| c32                               | 3442.0                      | 3442.1                       |
| c33                               | 3556.1                      | 3556.7                       |
| c34                               | 3669.3                      | 3668.3                       |

\*c-ions not observed

Calculated and experimental masses of c-ions observed in the linISD spectra for Gal-1—Gal-3 with SA.

|        | C2 and C16 - carbamidomethylation |                            |
|--------|-----------------------------------|----------------------------|
| c-ions | [MH] <sup>+</sup> (av) calc       | [MH] <sup>+</sup> (av) exp |
| c39    | 4170.8                            | 4169.3                     |
| c40    | 4284.9                            | 4285.7                     |
| c41    | 4398.0                            | 4397.0                     |
| c42    | 4501.2                            | 4502.1                     |
| c43    | 4614.3                            | 4614.0                     |
| c44    | 4751.5                            | 4750.7                     |
| c45    | 4898.6                            | 4899.2                     |
| c46    | 5012.7                            | -*                         |
| c47    | 5109.9                            | 5109.0                     |
| c48    | 5266.0                            | 5265.0                     |
| c49    | 5413.2                            | 5414.6                     |
| c50    | 5527.3                            | 5525.5                     |
| c51    | 5598.4                            | 5597.4                     |
| c52    | 5735.5                            | 5735.9                     |
| c53    | 5792.6                            | 5792.0                     |
| c54    | 5907.7                            | 5908.2                     |
| c55    | 5978.8                            | 5978.0                     |
| c56    | 6092.9                            | 6093.0                     |
| c57    | 6194.0                            | -*                         |
| c58    | 6307.1                            | -*                         |
| c59    | 6406.3                            | 6405.2                     |
| c60    | 6509.4                            | 6509.0                     |
| c61    | 6623.5                            | 6622.1                     |
| c62    | 6710.6                            | 6712.3                     |
| c63    | 6838.7                            | 6839.1                     |
| c64    | 6953.8                            | -*                         |
| c65    | 7010.9                            | -*                         |
| c66    | 7067.9                            | 7067.0                     |
| c67    | 7139.0                            | 7140.9                     |
| c68    | 7325.2                            | 7324.8                     |
| c69    | 7382.2                            | 7380.7                     |
| c70    | 7483.4                            | 7485.2                     |

\*c-ions not observed

# Gal-1—8S—Gal-3

A

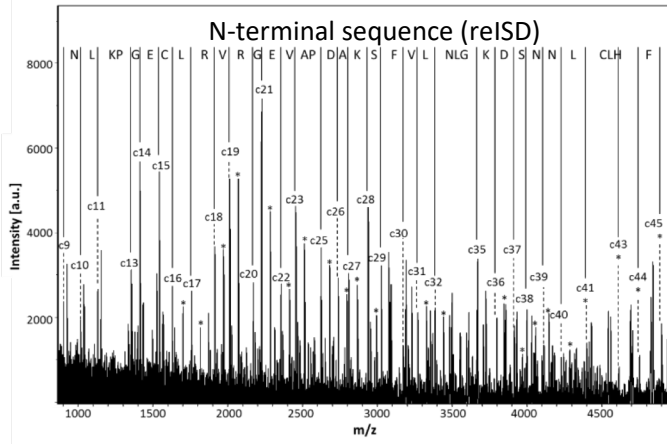

B

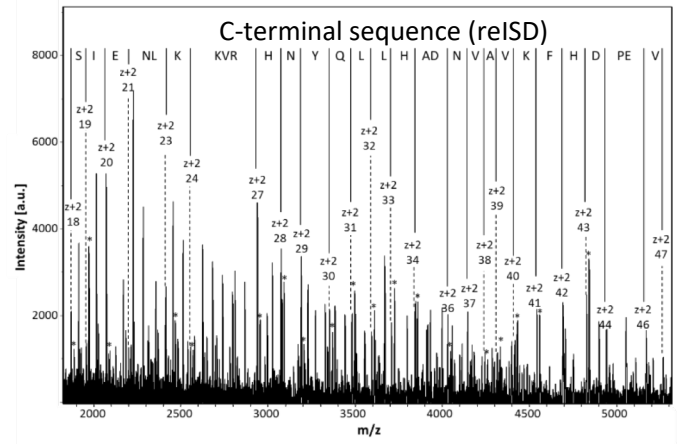

C

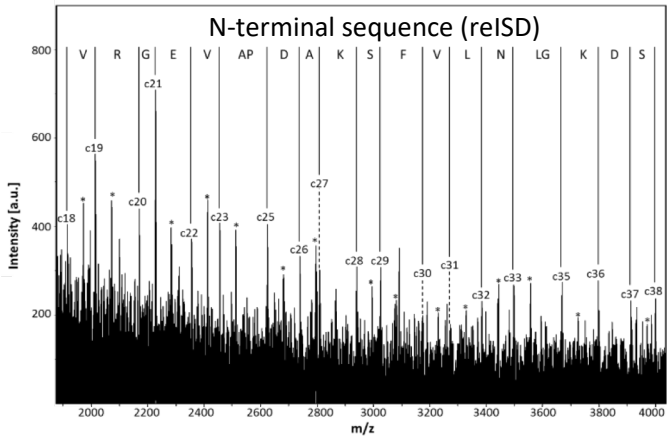

D

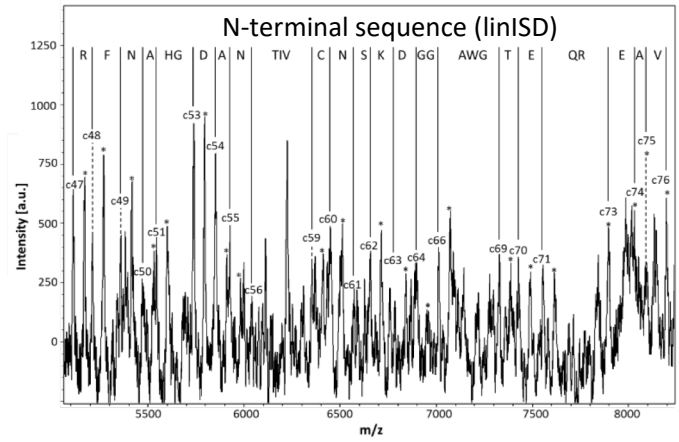

Calculated and experimental masses of c-ions observed in the reISD spectra for Gal-1—8S—Gal-3 with sDHB.

| c-ions | C2-carbamidomethylation       |                              | C2 and C16-carbamidomethylation |                              |
|--------|-------------------------------|------------------------------|---------------------------------|------------------------------|
|        | [MH] <sup>+</sup> (mono) calc | [MH] <sup>+</sup> (mono) exp | [MH] <sup>+</sup> (mono) calc   | [MH] <sup>+</sup> (mono) exp |
| c9     | 903.5                         | 903.1                        | 903.5                           | 903.1                        |
| c10    | 1017.5                        | 1017.6                       | 1017.5                          | 1017.6                       |
| c11    | 1130.6                        | 1130.6                       | 1130.6                          | 1130.6                       |
| c12    | 1258.7                        | .*                           | 1258.7                          | .*                           |
| c13    | 1355.7                        | 1355.8                       | 1355.7                          | 1355.8                       |
| c14    | 1412.8                        | 1412.8                       | 1412.8                          | 1412.8                       |
| c15    | 1541.8                        | 1541.9                       | 1541.8                          | 1541.9                       |
| c16    | 1644.8                        | 1643.9                       | 1701.8                          | 1702.0                       |
| c17    | 1757.9                        | 1757.9                       | 1814.9                          | 1814.9                       |
| c18    | 1914.0                        | 1914.0                       | 1971.0                          | 1971.0                       |
| c19    | 2013.1                        | 2013.1                       | 2070.1                          | 2070.1                       |
| c20    | 2169.2                        | 2169.2                       | 2226.2                          | 2226.2                       |
| c21    | 2226.2                        | 2226.2                       | 2283.2                          | 2283.2                       |
| c22    | 2355.2                        | 2355.1                       | 2412.3                          | 2412.2                       |
| c23    | 2454.3                        | 2454.2                       | 2511.3                          | 2511.4                       |
| c24    | 2525.3                        | .*                           | 2582.4                          | .*                           |
| c25    | 2622.4                        | 2622.4                       | 2679.4                          | 2679.3                       |
| c26    | 2737.4                        | 2737.3                       | 2794.4                          | 2794.4                       |
| c27    | 2808.5                        | 2808.4                       | 2865.5                          | 2865.4                       |
| c28    | 2936.6                        | 2936.5                       | 2993.6                          | 2993.7                       |
| c29    | 3023.6                        | 3023.5                       | 3080.6                          | 3080.6                       |
| c30    | 3170.7                        | .*                           | 3227.7                          | .*                           |
| c31    | 3269.7                        | 3269.7                       | 3326.7                          | 3326.8                       |
| c32    | 3382.8                        | 3383.8                       | 3439.8                          | 3439.8                       |
| c33    | 3496.9                        | .*                           | 3553.9                          | .*                           |
| c34    | 3609.9                        | 3609.0                       | 3667.0                          | 3667.0                       |
| c35    | 3666.0                        | 3667.0                       | 3724.0                          | .*                           |
| c36    | 3795.1                        | 3795.1                       | 3852.1                          | 3852.1                       |
| c37    | 3910.1                        | 3910.0                       | 3967.1                          | 3967.0                       |
| c38    | 3997.1                        | 3996.3                       | 4054.1                          | 4054.3                       |
| c39    | 4111.2                        | 4111.3                       | 4168.2                          | 4168.5                       |
| c40    | 4225.2                        | 4225.4                       | 4282.2                          | 4282.4                       |
| c41    | 4338.3                        | .*                           | 4395.3                          | 4395.5                       |
| c42    | 4441.3                        | .*                           | 4498.3                          | .*                           |
| c43    | 4554.4                        | 4554.9                       | 4611.4                          | 4611.9                       |
| c44    | 4691.4                        | .*                           | 4748.5                          | 4749.0                       |
| c45    | 4838.5                        | .*                           | 4895.5                          | 4895.5                       |

\*c-ions not observed



Calculated and experimental masses of z+2-ions observed in the reISD spectra for Gal-1—8S—Gal-3.

| z+2-ions | [MH] <sup>+</sup> (mono) calc | [MH] <sup>+</sup> (mono) exp |
|----------|-------------------------------|------------------------------|
| z+2 18   | 1870.0                        | 1870.1                       |
| z+2 19   | 1957.0                        | 1957.1                       |
| z+2 20   | 2070.1                        | 2070.2                       |
| z+2 21   | 2199.1                        | 2199.3                       |
| z+2 22   | 2313.2                        | -*                           |
| z+2 23   | 2426.2                        | 2426.3                       |
| z+2 24   | 2554.3                        | 2554.5                       |
| z+2 25   | 2682.4                        | -*                           |
| z+2 26   | 2781.5                        | -*                           |
| z+2 27   | 2937.6                        | 2936.7                       |
| z+2 28   | 3074.6                        | 3074.8                       |
| z+2 29   | 3188.7                        | 3188.9                       |
| z+2 30   | 3351.8                        | 3351.9                       |
| z+2 31   | 3479.8                        | 3479.9                       |
| z+2 32   | 3592.8                        | 3593.2                       |
| z+2 33   | 3706.0                        | 3706.3                       |
| z+2 34   | 3843.0                        | 3843.4                       |
| z+2 35   | 3914.1                        | -*                           |
| z+2 36   | 4029.1                        | 4029.3                       |
| z+2 37   | 4143.2                        | 4143.6                       |
| z+2 38   | 4242.2                        | 4242.8                       |
| z+2 39   | 4313.3                        | 4312.9                       |
| z+2 40   | 4412.3                        | 4412.7                       |
| z+2 41   | 4540.4                        | 4541.0                       |
| z+2 42   | 4687.5                        | 4687.2                       |
| z+2 43   | 4824.6                        | 4825.0                       |
| z+2 44   | 4939.6                        | 4939.4                       |
| z+2 45   | 5036.6                        | -*                           |
| z+2 46   | 5165.7                        | 5165.6                       |
| z+2 47   | 5264.7                        | 5264.7                       |

\*z+2-ions not observed

Calculated and experimental masses of y-ions observed in the reISD spectra for Gal-1—8S—Gal-3.

| y-ions | [MH] <sup>+</sup> (mono) calc | [MH] <sup>+</sup> (mono) exp |
|--------|-------------------------------|------------------------------|
| y18    | 1885.0                        | 1885.0                       |
| y19    | 1972.0                        | 1971.2                       |
| y20    | 2085.1                        | 2085.1                       |
| y21    | 2214.1                        | -*                           |
| y22    | 2328.2                        | 2328.4                       |
| y23    | 2441.2                        | 2441.3                       |
| y24    | 2569.3                        | 2568.4                       |
| y25    | 2697.4                        | 2697.5                       |
| y26    | 2796.5                        | -*                           |
| y27    | 2952.6                        | 2952.7                       |
| y28    | 3089.7                        | 3089.8                       |
| y29    | 3203.7                        | 3203.8                       |
| y30    | 3366.8                        | 3366.7                       |
| y31    | 3494.8                        | 3495.1                       |
| y32    | 3607.9                        | 3608.0                       |
| y33    | 3721.0                        | 3721.1                       |
| y34    | 3858.0                        | 3858.4                       |
| y35    | 3929.1                        | 3929.6                       |
| y36    | 4044.1                        | 4044.6                       |
| y37    | 4158.2                        | -*                           |
| y38    | 4257.2                        | 4256.6                       |
| y39    | 4328.3                        | 4328.7                       |
| y40    | 4427.3                        | 4427.8                       |
| y41    | 4555.4                        | 4555.8                       |
| y42    | 4702.5                        | -*                           |
| y43    | 4839.6                        | 4839.3                       |
| y44    | 4954.6                        | -*                           |
| y45    | 5051.6                        | 5051.5                       |

\*y-ions not observed

Calculated and experimental masses of c-ions observed in the reISD spectra for Gal-1—8S—Gal-3 with SA.

| c-ions | C2-carbamidomethylation     |                            | C2 and C16-carbamidomethylation |                            |
|--------|-----------------------------|----------------------------|---------------------------------|----------------------------|
|        | [MH] <sup>+</sup> (av) calc | [MH] <sup>+</sup> (av) exp | [MH] <sup>+</sup> (av) calc     | [MH] <sup>+</sup> (av) exp |
| c18    | 1915.3                      | 1915.4                     | 1972.3                          | 1972.3                     |
| c19    | 2014.4                      | 2014.6                     | 2071.4                          | 2071.3                     |
| c20    | 2170.6                      | 2170.4                     | 2227.6                          | 2227.7                     |
| c21    | 2227.6                      | 2227.7                     | 2284.7                          | 2284.8                     |
| c22    | 2356.8                      | 2356.4                     | 2413.8                          | 2414.2                     |
| c23    | 2455.9                      | 2456.3                     | 2512.9                          | 2513.0                     |
| c24    | 2527.0                      | -*                         | 2584.0                          | -*                         |
| c25    | 2624.1                      | 2623.7                     | 2681.1                          | 2680.8                     |
| c26    | 2739.2                      | 2739.7                     | 2796.2                          | 2796.5                     |
| c27    | 2810.2                      | 2810.0                     | 2867.3                          | 2867.3                     |
| c28    | 2938.4                      | 2938.7                     | 2995.5                          | 2995.7                     |
| c29    | 3025.5                      | 3025.8                     | 3082.5                          | 3082.5                     |
| c30    | 3172.7                      | 3172.9                     | 3229.7                          | 3230.2                     |
| c31    | 3271.8                      | 3272.1                     | 3328.9                          | 3328.8                     |
| c32    | 3385.0                      | 3385.3                     | 3442.0                          | 3441.7                     |
| c33    | 3499.1                      | 3499.3                     | 3556.1                          | -*                         |
| c34    | 3612.2                      | -*                         | 3669.3                          | 3669.4                     |
| c35    | 3669.3                      | 3669.4                     | 3726.3                          | 3726.5                     |
| c36    | 3797.4                      | 3798.1                     | 3854.5                          | -*                         |
| c37    | 3912.5                      | 3912.5                     | 3969.6                          | 3969.8                     |
| c38    | 3999.6                      | 3999.4                     | 4056.7                          | -*                         |

\*c-ions not observed

Calculated and experimental masses of c-ions observed in the linISD spectra for Gal-1—8S—Gal-3 with SA.

| c-ions | C2-carbamidomethylation     |                            | C2 and C16-carbamidomethylation |                            |
|--------|-----------------------------|----------------------------|---------------------------------|----------------------------|
|        | [MH] <sup>+</sup> (av) calc | [MH] <sup>+</sup> (av) exp | [MH] <sup>+</sup> (av) calc     | [MH] <sup>+</sup> (av) exp |
| c47    | 5052.8                      | 5053.9                     | 5109.9                          | 5110.3                     |
| c48    | 5209.0                      | 5209.4                     | 5266.0                          | 5266.0                     |
| c49    | 5356.2                      | 5357.4                     | 5413.2                          | 5412.3                     |
| c50    | 5470.3                      | 5469.4                     | 5527.3                          | 5527.5                     |
| c51    | 5541.3                      | 5542.8                     | 5598.4                          | 5598.8                     |
| c52    | 5678.5                      | -*                         | 5735.5                          | 5735.8                     |
| c53    | 5735.5                      | 5735.8                     | 5792.6                          | 5794.1                     |
| c54    | 5850.6                      | 5851.0                     | 5907.7                          | 5909.1                     |
| c55    | 5921.7                      | 5922.4                     | 5978.8                          | 5980.7                     |
| c56    | 6035.8                      | 6037.5                     | 6092.9                          | -*                         |
| c57    | 6136.9                      | -*                         | 6194.0                          | -*                         |
| c58    | 6250.1                      | -*                         | 6307.1                          | 6308.8                     |
| c59    | 6349.2                      | 6349.9                     | 6406.3                          | 6405.7                     |
| c60    | 6452.3                      | 6451.8                     | 6509.4                          | 6509.5                     |
| c61    | 6566.4                      | 6567.8                     | 6623.5                          | -*                         |
| c62    | 6653.5                      | 6654.5                     | 6710.6                          | 6712.4                     |
| c63    | 6781.7                      | 6782.2                     | 6838.7                          | 6839.1                     |
| c64    | 6896.8                      | 6895.8                     | 6953.8                          | -*                         |
| c65    | 6953.8                      | -*                         | 7010.9                          | 7010.5                     |
| c66    | 7010.9                      | 7010.5                     | 7067.9                          | 7068.6                     |
| c67    | 7082.0                      | -*                         | 7139.0                          | 7139.9                     |
| c68    | 7268.2                      | -*                         | 7325.2                          | 7324.4                     |
| c69    | 7325.2                      | 7324.4                     | 7382.2                          | 7384.2                     |
| c70    | 7426.3                      | 7427.4                     | 7483.4                          | 7483.7                     |
| c71    | 7555.4                      | 7555.5                     | 7612.5                          | 7614.0                     |
| c72    | 7683.6                      | -*                         | 7740.6                          | -*                         |
| c73    | 7839.8                      | -*                         | 7896.8                          | 7896.8                     |
| c74    | 7968.9                      | -*                         | 8025.9                          | 8026.8                     |
| c75    | 8040.0                      | -*                         | 8097.0                          | 8096.6                     |
| c76    | 8139.1                      | -*                         | 8196.1                          | 8197.5                     |

\*c-ions not observed

# Gal-3NT/1

A

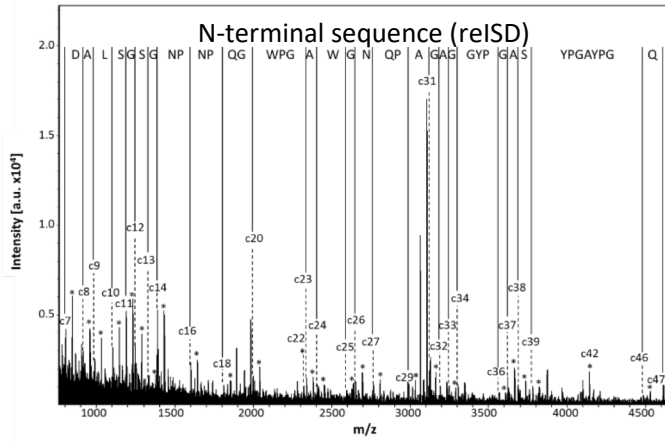

B

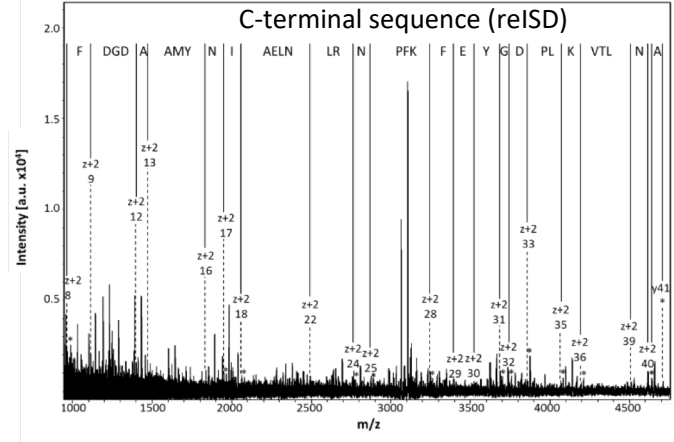

C

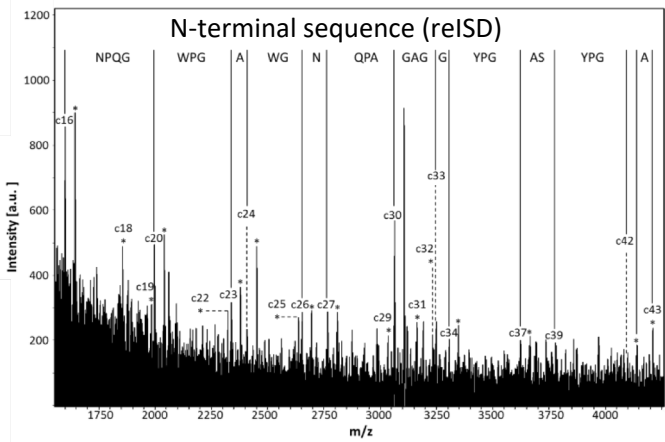

D

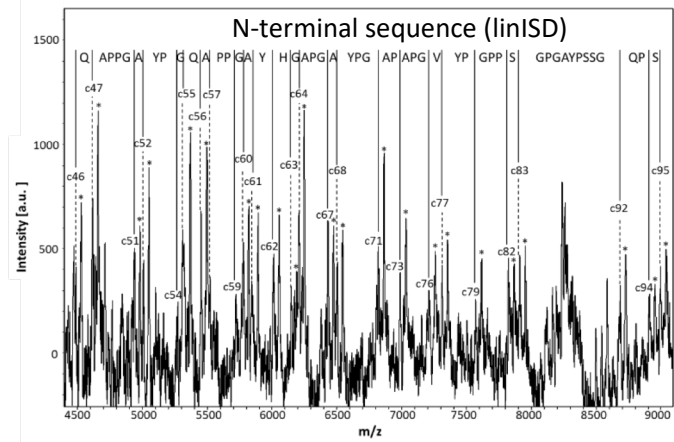

Calculated and experimental masses of c-ions observed in the reISD spectra for Gal-3NT/1 with sDHB.

| c-ions | No modifications              |                              | N-terminal acetylation        |                              |
|--------|-------------------------------|------------------------------|-------------------------------|------------------------------|
|        | [MH] <sup>+</sup> (mono) calc | [MH] <sup>+</sup> (mono) exp | [MH] <sup>+</sup> (mono) calc | [MH] <sup>+</sup> (mono) exp |
| c11    | 1053.6                        | 1053.7                       | 1095.6                        | _*                           |
| c12    | 1167.6                        | 1167.7                       | 1209.7                        | _*                           |
| c13    | 1280.7                        | _*                           | 1322.7                        | _*                           |
| c14    | 1377.8                        | 1377.8                       | 1419.8                        | _*                           |
| c15    | 1490.9                        | _*                           | 1532.9                        | _*                           |
| c16    | 1587.9                        | _*                           | 1629.9                        | _*                           |
| c17    | 1644.9                        | 1644.9                       | 1687.0                        | _*                           |
| c18    | 1702.0                        | 1702.1                       | 1744.0                        | _*                           |
| c19    | 1801.0                        | _*                           | 1843.0                        | _*                           |
| c20    | 1900.1                        | _*                           | 1942.1                        | _*                           |
| c21    | 1997.2                        | _*                           | 2039.2                        | _*                           |
| c22    | 2153.2                        | 2153.3                       | 2195.3                        | 2195.3                       |
| c23    | 2284.3                        | 2284.3                       | 2326.3                        | 2326.2                       |
| c24    | 2397.4                        | 2397.5                       | 2439.4                        | _*                           |
| c25    | 2510.5                        | 2510.5                       | 2552.5                        | 2552.5                       |
| c26    | 2611.5                        | 2611.5                       | 2653.5                        | 2653.5                       |
| c27    | 2724.6                        | 2724.6                       | 2766.6                        | 2766.7                       |
| c28    | 2837.7                        | _*                           | 2879.7                        | 2879.7                       |
| c29    | 2894.7                        | 2894.7                       | 2936.7                        | 2936.7                       |
| c30    | 2995.8                        | 2996.0                       | 3037.8                        | _*                           |
| c31    | 3094.8                        | 3094.9                       | 3136.8                        | 3137.1                       |
| c32    | 3222.9                        | _*                           | 3264.9                        | _*                           |
| c33    | 3320.0                        | 3320.2                       | 3362.0                        | 3362.0                       |
| c34    | 3434.0                        | 3434.1                       | 3476.0                        | _*                           |
| c35    | 3505.0                        | 3505.2                       | 3547.0                        | 3547.1                       |
| c36    | 3619.1                        | 3619.3                       | 3661.1                        | _*                           |
| c37    | 3775.2                        | 3775.6                       | 3817.2                        | _*                           |
| c38    | 3888.3                        | 3888.4                       | 3930.3                        | 3930.2                       |
| c39    | 3959.3                        | 3959.2                       | 4001.3                        | 4001.5                       |
| c40    | 4072.4                        | _*                           | 4114.4                        | 4114.6                       |
| c41    | 4187.4                        | 4187.6                       | 4229.4                        | _*                           |
| c42    | 4334.5                        | 4334.9                       | 4376.5                        | 4377.0                       |
| c43    | 4462.6                        | 4463.0                       | 4504.6                        | _*                           |
| c44    | 4618.6                        | 4619.3                       | 4660.7                        | _*                           |
| c45    | 4675.7                        | 4676.1                       | 4717.7                        | _*                           |
| c46    | 4789.7                        | 4790.3                       | 4831.7                        | _*                           |
| c47    | 4904.7                        | _*                           | 4946.8                        | _*                           |
| c48    | 5003.8                        | 5004.5                       | 5045.8                        | _*                           |
| c49    | 5074.8                        | 5074.5                       | 5116.9                        | _*                           |
| c50    | 5221.9                        | 5222.7                       | 5263.9                        | _*                           |
| c51    | 5359.0                        | 5359.8                       | 5401.0                        | _*                           |
| c52    | 5506.0                        | 5506.4                       | 5548.0                        | _*                           |

\*c-ions not observed

Calculated and experimental masses of z+2-ions  
observed in the reISD spectra for Gal-3NT/1.

| z+2-ions | [MH] <sup>+</sup> (mono) calc | [MH] <sup>+</sup> (mono) exp |
|----------|-------------------------------|------------------------------|
| z+2 8    | 965.5                         | 965.7                        |
| z+2 9    | 1112.6                        | 1112.8                       |
| z+2 10   | 1227.6                        | .*                           |
| z+2 11   | 1284.6                        | .*                           |
| z+2 12   | 1399.7                        | 1399.8                       |
| z+2 13   | 1470.7                        | 1470.9                       |
| z+2 14   | 1541.7                        | .*                           |
| z+2 15   | 1672.8                        | .*                           |
| z+2 16   | 1837.1                        | 1836.1                       |
| z+2 17   | 1949.9                        | 1950.1                       |
| z+2 18   | 2063.0                        | 2063.0                       |
| z+2 19   | 2134.0                        | .*                           |
| z+2 20   | 2263.0                        | .*                           |
| z+2 21   | 2376.1                        | .*                           |
| z+2 22   | 2490.2                        | 2490.2                       |
| z+2 23   | 2603.3                        | .*                           |
| z+2 24   | 2759.4                        | 2759.6                       |
| z+2 25   | 2873.4                        | 2873.7                       |
| z+2 26   | 2970.4                        | .*                           |
| z+2 27   | 3117.5                        | .*                           |
| z+2 28   | 3245.6                        | 3245.8                       |
| z+2 29   | 3392.7                        | 3392.7                       |
| z+2 30   | 3521.7                        | 3522.0                       |
| z+2 31   | 3684.8                        | 3685.0                       |
| z+2 32   | 3741.8                        | 3742.2                       |
| z+2 33   | 3856.8                        | 3857.6                       |
| z+2 34   | 3953.9                        | .*                           |
| z+2 35   | 4067.0                        | 4067.3                       |
| z+2 36   | 4195.1                        | 4195.6                       |
| z+2 37   | 4294.1                        | .*                           |
| z+2 38   | 4395.2                        | .*                           |
| z+2 39   | 4508.3                        | 4508.6                       |
| z+2 40   | 4622.3                        | 4622.6                       |

\*z+2-ions not observed

Calculated and experimental masses of y-ions  
observed in the reISD spectra for Gal-3NT/1.

| y-ions | [MH] <sup>+</sup> (mono) calc | [MH] <sup>+</sup> (mono) exp |
|--------|-------------------------------|------------------------------|
| y8     | 980.5                         | 980.6                        |
| y9     | 1127.6                        | .*                           |
| y10    | 1242.7                        | .*                           |
| y11    | 1299.6                        | 1299.8                       |
| y12    | 1414.7                        | .*                           |
| y13    | 1485.7                        | .*                           |
| y14    | 1556.7                        | .*                           |
| y15    | 1687.8                        | .*                           |
| y16    | 1850.8                        | .*                           |
| y17    | 1964.9                        | 1965.1                       |
| y18    | 2078.0                        | 2078.2                       |
| y19    | 2149.0                        | .*                           |
| y20    | 2278.1                        | 2278.2                       |
| y21    | 2391.1                        | .*                           |
| y22    | 2505.2                        | .*                           |
| y23    | 2618.3                        | .*                           |
| y24    | 2774.4                        | 2774.7                       |
| y25    | 2888.4                        | 2888.6                       |
| y26    | 2985.5                        | 2984.7                       |
| y27    | 3132.5                        | .*                           |
| y28    | 3260.6                        | 3260.9                       |
| y29    | 3407.7                        | .*                           |
| y30    | 3536.7                        | .*                           |
| y31    | 3699.8                        | 3700.3                       |
| y32    | 3756.8                        | 3757.1                       |
| y33    | 3871.8                        | 3872.2                       |
| y34    | 3968.9                        | 3969.4                       |
| y35    | 4082.0                        | 4082.2                       |
| y36    | 4210.1                        | 4210.4                       |
| y37    | 4309.1                        | .*                           |
| y38    | 4410.2                        | .*                           |
| y39    | 4523.3                        | .*                           |
| y40    | 4637.3                        | 4637.0                       |
| y41    | 4708.4                        | 4708.0                       |

\*y-ions not observed

Calculated and experimental masses of c-ions observed in the reISD spectra for Gal-3NT/1 with SA.

| c-ions | No modification               |                              | N-terminal acetylation        |                              |
|--------|-------------------------------|------------------------------|-------------------------------|------------------------------|
|        | [MH] <sup>+</sup> (mono) calc | [MH] <sup>+</sup> (mono) exp | [MH] <sup>+</sup> (mono) calc | [MH] <sup>+</sup> (mono) exp |
| c22    | 2153.2                        | 2153.2                       | 2195.3                        | 2195.2                       |
| c23    | 2284.3                        | 2284.2                       | 2326.3                        | 2326.2                       |
| c24    | 2397.4                        | 2397.3                       | 2439.4                        | 2439.3                       |
| c25    | 2510.5                        | 2510.4                       | 2552.5                        | 2552.4                       |
| c26    | 2611.5                        | 2611.4                       | 2653.5                        | 2653.4                       |
| c27    | 2724.6                        | 2724.5                       | 2766.6                        | 2766.5                       |
| c28    | 2837.7                        | 2837.5                       | 2879.7                        | 2879.5                       |
| c29    | 2894.7                        | 2894.5                       | 2936.7                        | 2936.6                       |
| c30    | 2995.8                        | 2995.5                       | 3037.8                        | 3038.1                       |
| c31    | 3094.8                        | 3094.7                       | 3136.8                        | 3136.8                       |
| c32    | 3222.9                        | -*                           | 3264.9                        | -*                           |
| c33    | 3320.0                        | 3319.8                       | 3362.0                        | 3361.5                       |
| c34    | 3434.0                        | 3433.8                       | 3476.0                        | 3476.4                       |
| c35    | 3505.0                        | 3504.9                       | 3547.1                        | 3546.7                       |
| c36    | 3619.1                        | 3619.1                       | 3661.1                        | 3660.8                       |
| c37    | 3775.2                        | 3775.4                       | 3817.2                        | -*                           |
| c38    | 3888.3                        | 3888.0                       | 3930.3                        | -*                           |
| c39    | 3959.3                        | -*                           | 4001.3                        | -*                           |
| c40    | 4072.4                        | 4072.2                       | 4114.4                        | 4114.8                       |

\*c-ions not observed

Calculated and experimental masses of c-ions observed in the linISD spectra for Gal-3NT/1 with SA.

| c-ions | No modification             |                            | N-terminal acetylation      |                            | c-ions | No modification             |                            | N-terminal acetylation      |                            |
|--------|-----------------------------|----------------------------|-----------------------------|----------------------------|--------|-----------------------------|----------------------------|-----------------------------|----------------------------|
|        | [MH] <sup>+</sup> (av) calc | [MH] <sup>+</sup> (av) exp | [MH] <sup>+</sup> (av) calc | [MH] <sup>+</sup> (av) exp |        | [MH] <sup>+</sup> (av) calc | [MH] <sup>+</sup> (av) exp | [MH] <sup>+</sup> (av) calc | [MH] <sup>+</sup> (av) exp |
| c46    | 4486.7                      | 4485.9                     | 4528.7                      | 4528.8                     | c71    | 6818.2                      | 6819.2                     | 6860.2                      | 6860.3                     |
| c47    | 4614.8                      | 4613.6                     | 4656.9                      | 4658.3                     | c72    | 6889.3                      | -*                         | 6931.3                      | -*                         |
| c48    | 4685.9                      | -*                         | 4727.9                      | -*                         | c73    | 6986.4                      | 6986.8                     | 7028.4                      | 7029.2                     |
| c49    | 4783.0                      | -*                         | 4825.0                      | -*                         | c74    | 7057.5                      | -*                         | 7099.5                      | -*                         |
| c50    | 4880.1                      | -*                         | 4922.2                      | -*                         | c75    | 7154.6                      | -*                         | 7196.6                      | -*                         |
| c51    | 4937.2                      | 4937.5                     | 4979.2                      | 4979.8                     | c76    | 7211.6                      | 7210.7                     | 7253.7                      | 7253.3                     |
| c52    | 5008.3                      | 5008.6                     | 5050.3                      | 5048.9                     | c77    | 7310.8                      | 7311.7                     | 7352.8                      | 7351.1                     |
| c53    | 5171.4                      | -*                         | 5213.5                      | -*                         | c78    | 7473.9                      | -*                         | 7516.0                      | -*                         |
| c54    | 5268.5                      | 5267.6                     | 5310.6                      | 5309.5                     | c79    | 7571.0                      | 7569.8                     | 7613.1                      | 7614.9                     |
| c55    | 5325.6                      | 5324.4                     | 5367.6                      | 5367.5                     | c80    | 7628.1                      | -*                         | 7670.1                      | -*                         |
| c56    | 5453.7                      | 5453.8                     | 5495.8                      | 5495.1                     | c81    | 7725.2                      | -*                         | 7767.3                      | -*                         |
| c57    | 5524.8                      | 5524.8                     | 5566.8                      | -*                         | c82    | 7822.3                      | 7823.5                     | 7864.4                      | 7865.1                     |
| c58    | 5621.9                      | -*                         | 5664.0                      | -*                         | c83    | 7909.4                      | 7910.8                     | 7951.4                      | 7953.0                     |
| c59    | 5719.0                      | 5719.9                     | 5761.1                      | -*                         | c84    | 7966.5                      | -*                         | 8008.5                      | -*                         |
| c60    | 5776.1                      | 5774.5                     | 5818.1                      | 5818.3                     | c85    | 8063.6                      | -*                         | 8105.6                      | -*                         |
| c61    | 5847.2                      | 5846.0                     | 5889.2                      | 5889.3                     | c86    | 8120.6                      | -*                         | 8162.7                      | 8162.1                     |
| c62    | 6010.3                      | 6011.8                     | 6052.4                      | 6050.9                     | c87    | 8191.7                      | -*                         | 8233.7                      | -*                         |
| c63    | 6147.5                      | 6147.8                     | 6189.5                      | 6187.8                     | c88    | 8354.9                      | -*                         | 8396.9                      | -*                         |
| c64    | 6204.5                      | 6203.0                     | 6246.6                      | 6247.6                     | c89    | 8452.0                      | -*                         | 8494.0                      | -*                         |
| c65    | 6275.6                      | -*                         | 6317.6                      | -*                         | c90    | 8539.1                      | -*                         | 8581.1                      | -*                         |
| c66    | 6372.7                      | -*                         | 6414.6                      | -*                         | c91    | 8626.1                      | -*                         | 8668.2                      | -*                         |
| c67    | 6429.8                      | 6429.1                     | 6471.8                      | 6470.8                     | c92    | 8683.2                      | 8684.9                     | 8725.2                      | -*                         |
| c68    | 6500.8                      | 6499.3                     | 6542.9                      | 6541.6                     | c93    | 8811.3                      | -*                         | 8853.4                      | -*                         |
| c69    | 6664.0                      | -*                         | 6706.1                      | -*                         | c94    | 8908.4                      | 8909.9                     | 8950.5                      | 8951.1                     |
| c70    | 6761.1                      | -*                         | 6803.2                      | 6802.9                     | c95    | 8995.5                      | 8996.6                     | 9037.6                      | 9038.7                     |

\*c-ions not observed
